# Supplementary material for: Tunable third-order nonlinear optical effect via modifying Ti4(embonate)6 cage-based ionic pairs
Source: Royal Society of Chemistry journal article supplement (doi:10.1039/d2qi00138a), 2022-01-01
Supplement: d2qi00138a1.pdf [file d2qi00138a1.pdf]

## Electronic Supplementary Information

### **Tunable Third-Order Nonlinear Optical Effect via Modifying $\text{Ti}_4(\text{embonate})_6$ Cage-Based Ionic Pairs**

*Guang-Hui Chen, Yan-Ping He \*, Zi-Rui Wang, Qiao-Hong Li, Zhi-Zhou Ma, and Jian Zhang*

\*

G.-H. Chen, Y.-P. He, Z.-R. Wang, Q.-H. Li, Z.-Z. Ma, J. Zhang

State Key Laboratory of Structural Chemistry, Fujian Institute of Research on the Structure of Matter, Chinese Academy of Sciences, Fuzhou, Fujian 350002, P. R. China.

E-mail: hyp041@163.com; zhj@fjirsm.ac.cn

Y.-P. He

University of Chinese Academy of Sciences, Beijing 100049, P. R. China.

E-mail: hyp041@163.com

## **Contents**

|                                                                     |           |
|---------------------------------------------------------------------|-----------|
| <b>1. The PXRD Analyses for PTCs .....</b>                          | <b>3</b>  |
| <b>2. Detailed Structure Information for PTCs.....</b>              | <b>5</b>  |
| <b>3. The SEM-Mapping Spectra of PTCs.....</b>                      | <b>17</b> |
| <b>4. The EDS Spectra of PTCs .....</b>                             | <b>18</b> |
| <b>5. The UV-Vis Spectra of PTCs.....</b>                           | <b>20</b> |
| <b>6. The FT-IR Spectra of PTCs .....</b>                           | <b>22</b> |
| <b>7. The TGA curve of PTCs .....</b>                               | <b>23</b> |
| <b>8. The XPS Spectra of PTCs.....</b>                              | <b>25</b> |
| <b>9. The NLO Property and NICS(0) Method Studies of PTCs .....</b> | <b>28</b> |
| <b>10. Crystallography Data.....</b>                                | <b>32</b> |
| <b>11. Reference.....</b>                                           | <b>33</b> |

## 1. The PXRD Analyses for PTCs

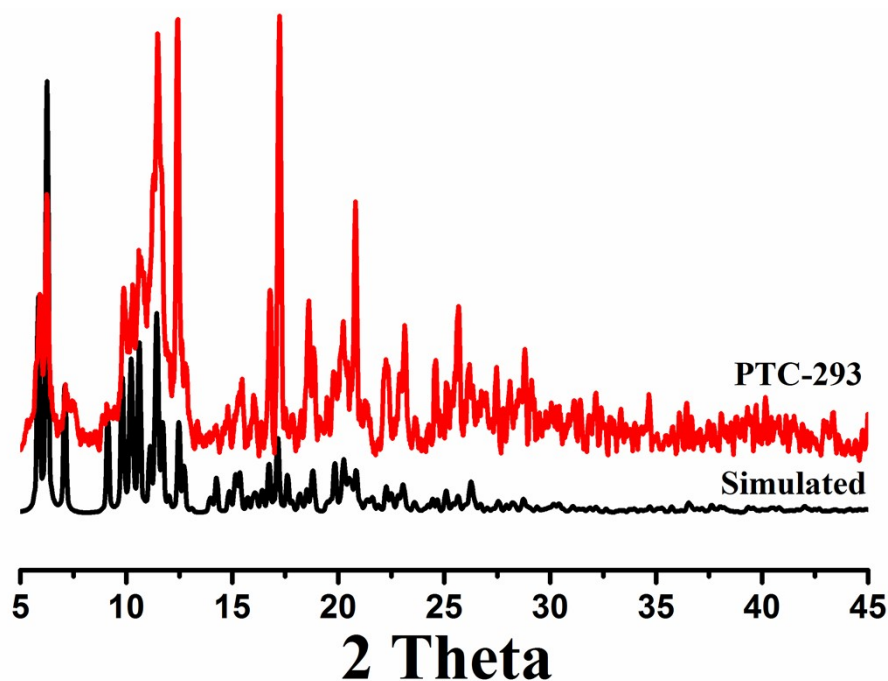

**Figure S1.** The PXRD patterns of simulated from the single-crystal data of **PTC-293** (black), as-synthesized **PTC-293** (red).

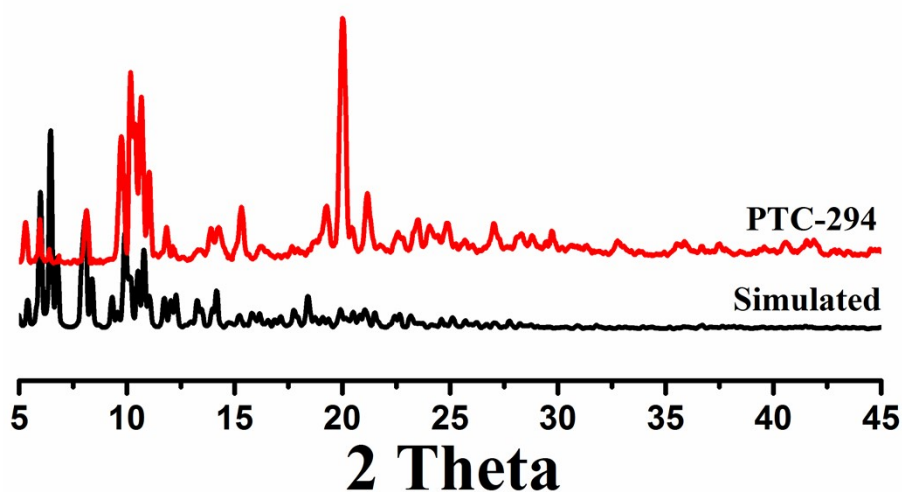

**Figure S2.** The PXRD patterns of simulated from the single-crystal data of **PTC-294** (black), as-synthesized **PTC-294** (red).

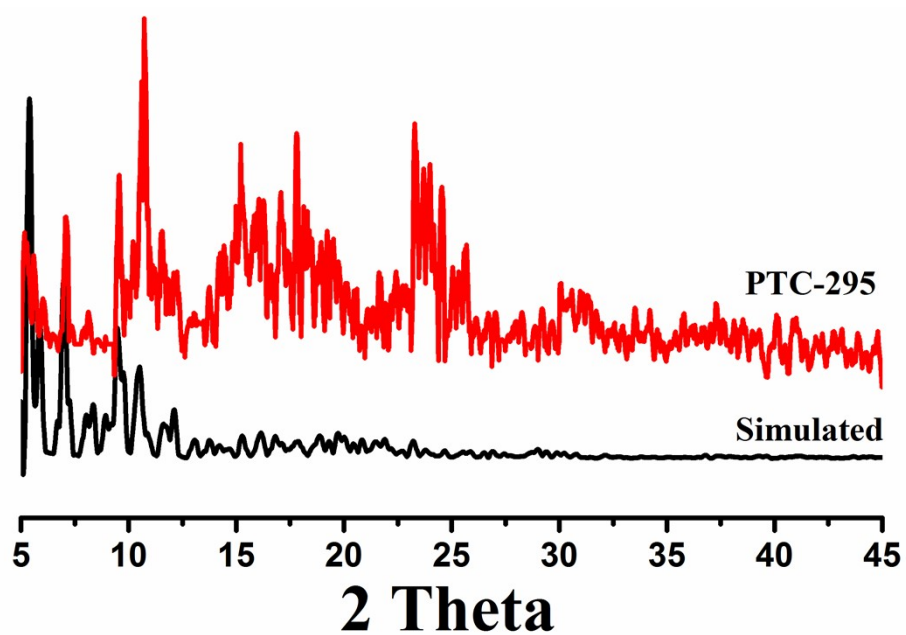

**Figure S3.** The PXRD patterns of simulated from the single-crystal data of **PTC-295** (black), as-synthesized **PTC-295** (red).

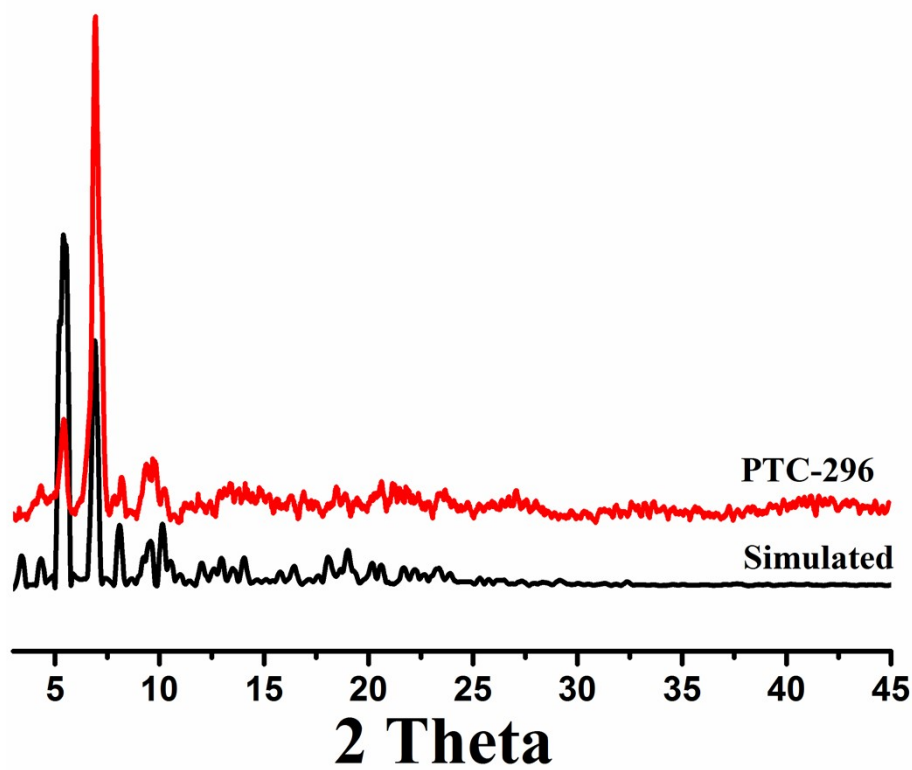

**Figure S4.** The PXRD patterns of simulated from the single-crystal data of **PTC-296** (black), as-synthesized **PTC-296** (red).

## 2. Detailed Structure Information for PTCs.

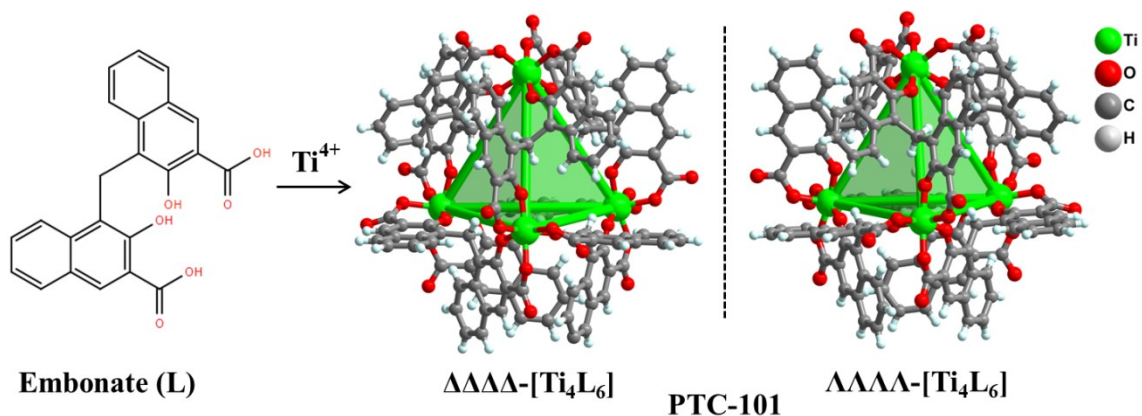

**Figure S5.** Illustration of the structures of the embonate (L) ligand, the  $\Delta\Delta\Delta\Delta\text{-[Ti}_4\text{L}_6]$  and  $\Lambda\Lambda\Lambda\Lambda\text{-[Ti}_4\text{L}_6]$  isomers in PTC-101.<sup>1</sup>

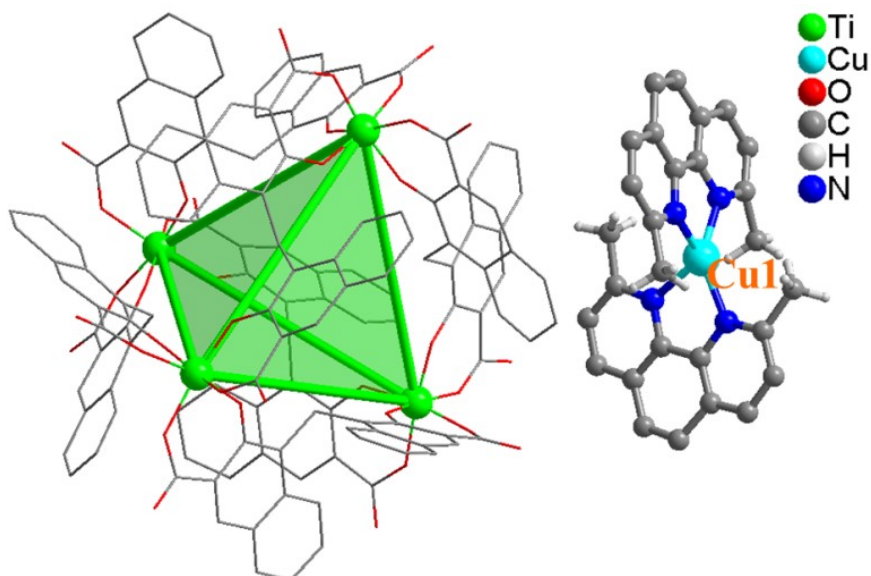

**Figure S6.** The asymmetric unit of **PTC-293**, showing one  $\text{Ti}_4\text{L}_6$  cage, one  $[\text{Cu}(\text{Me}_2\text{phen})_2]^+$  cation and some free  $(\text{NH}_4)^+$  cations which could not be located because of highly disorder.

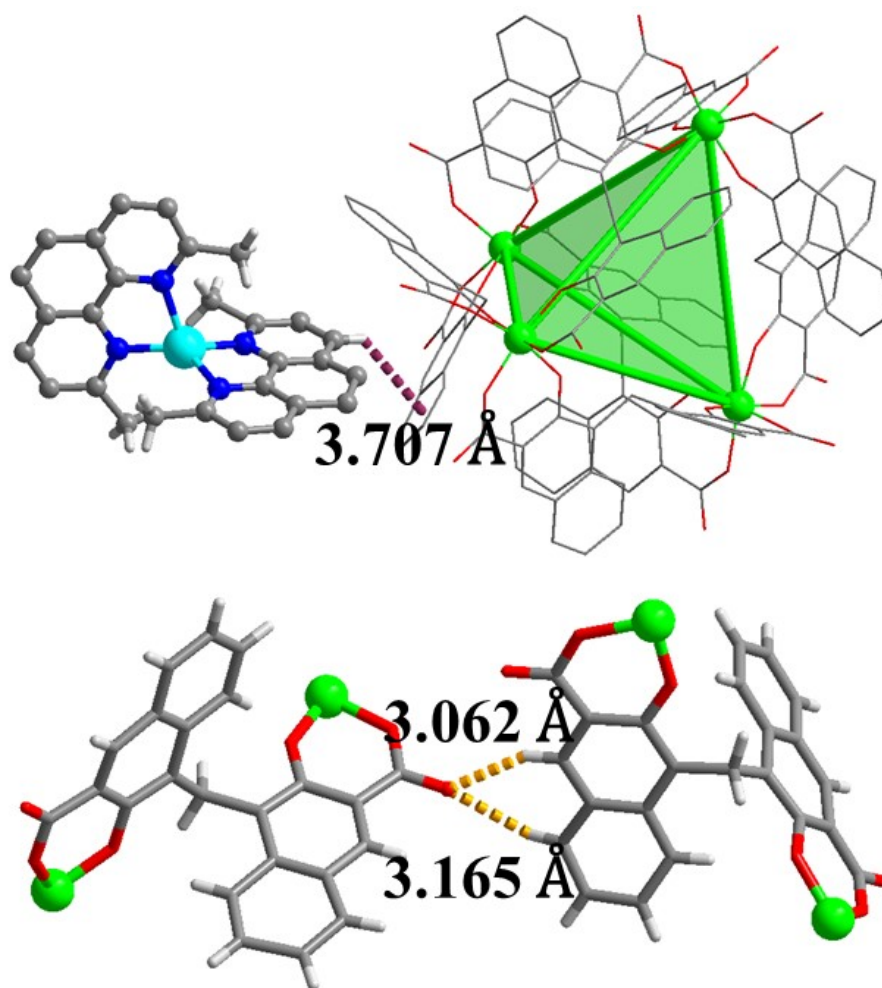

**Figure S7.** The highlighting of the C–H $\cdots$  $\pi$  and the C–H $\cdots$ O weak interactions between adjacent Ti<sub>4</sub>L<sub>6</sub> cage and [Cu(Me<sub>2</sub>phen)<sub>2</sub>]<sup>+</sup> cation or two Ti<sub>4</sub>L<sub>6</sub> cages, respectively.

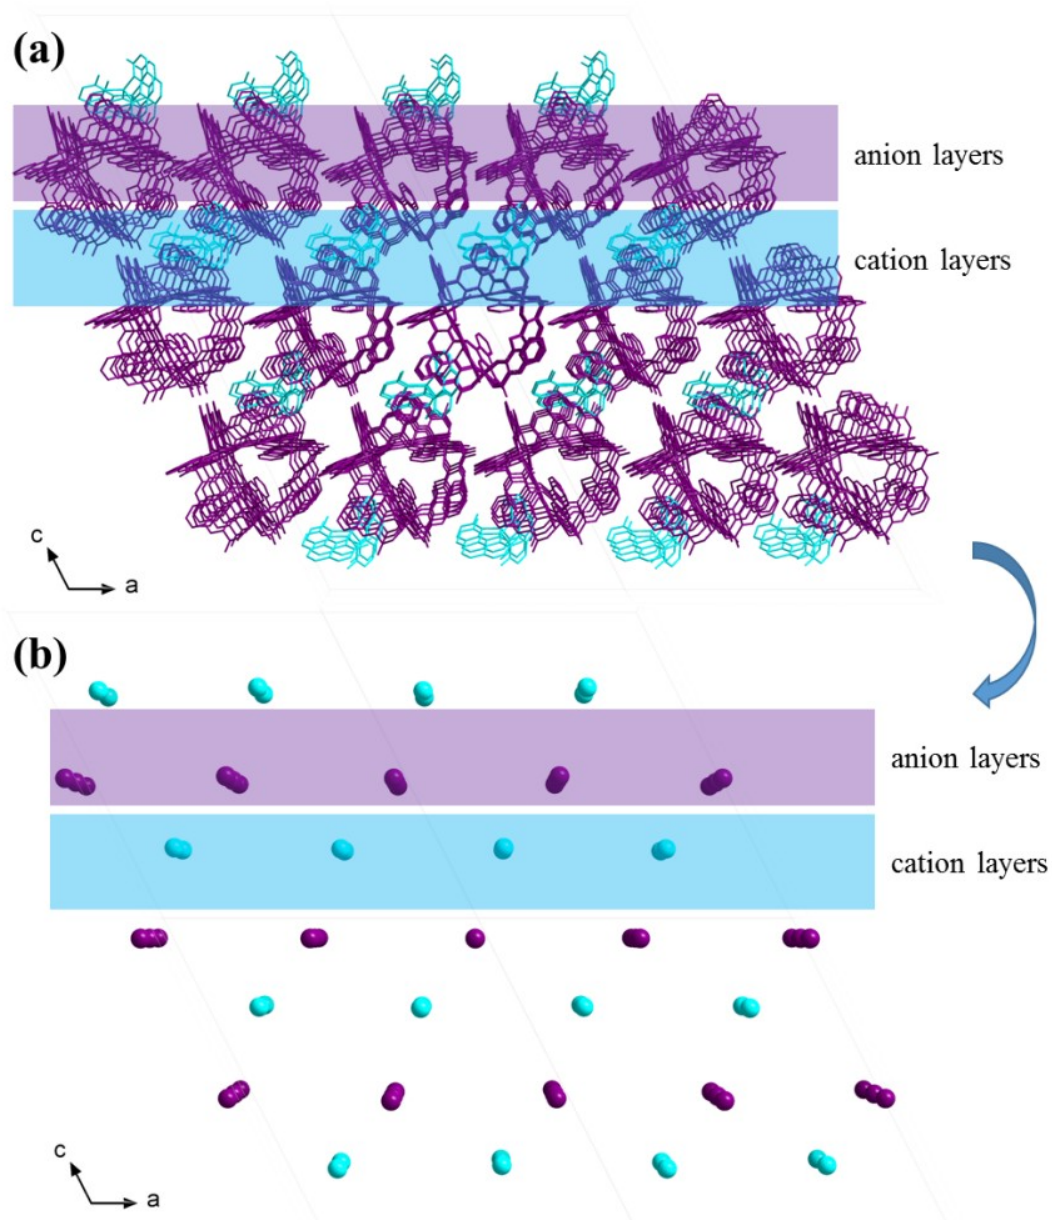

**Figure S8.** (a) Molecular packing diagram of **PTC-293** co-crystals projected along the crystallographic b-axis. (b) Schematic illustration of  $\text{Ti}_4(\text{embonate})_6$ -based ionic pairs methodology with conventional parallel-type cation–anion assembly with alternating cation and anion layers.

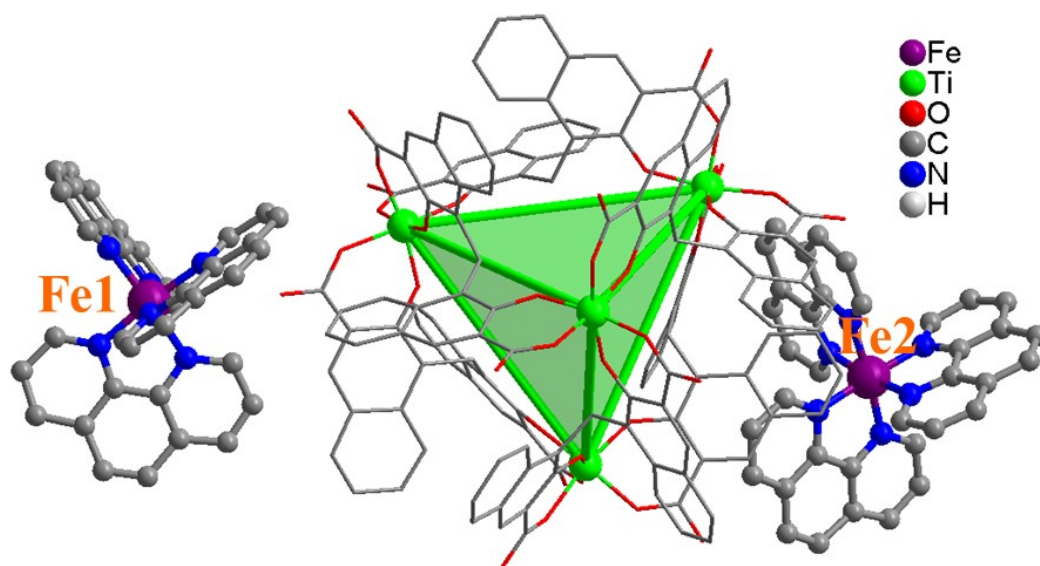

**Figure S9.** The asymmetric unit of PTC-294, showing one  $\text{Ti}_4\text{L}_6$  cage, two  $[\text{Fe}(\text{phen})_3]^{2+}$  cations, and some free  $(\text{NH}_4)^+$  cations.

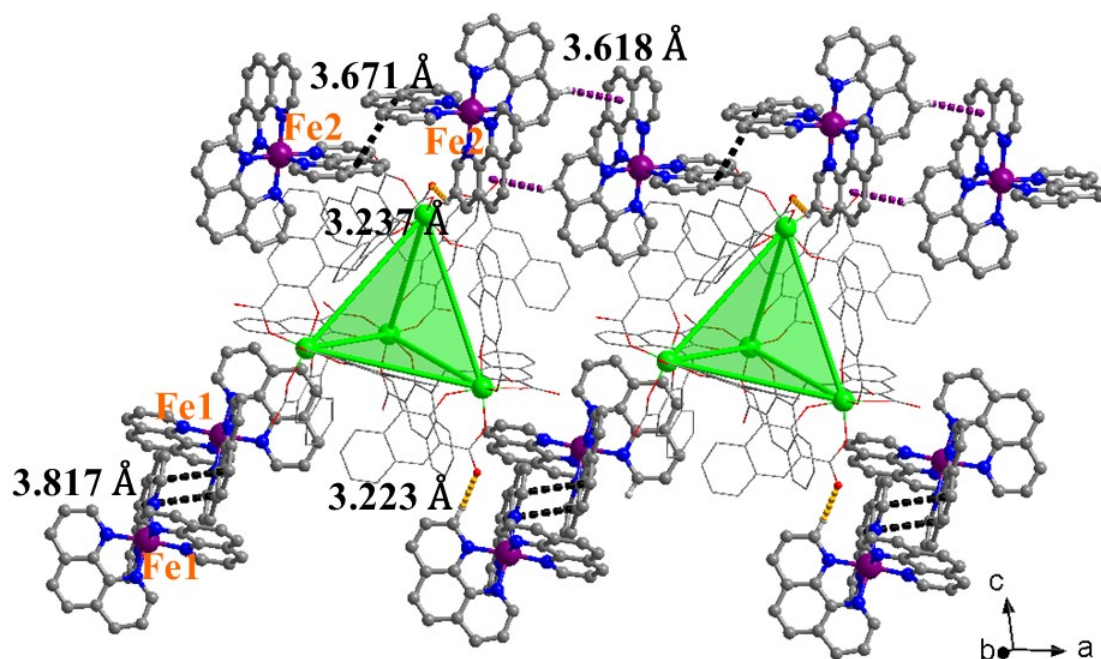

**Figure S10.** The highlighting of the  $\pi \cdots \pi$  stacking and  $\text{C-H} \cdots \pi$  interactions between adjacent  $[\text{Fe}(\text{phen})_3]^{2+}$  cations as well as the  $\text{C-H} \cdots \text{O}$  hydrogen bonds between adjacent  $\text{Ti}_4\text{L}_6$  cage and  $[\text{Fe}(\text{phen})_3]^{2+}$  cation, respectively.

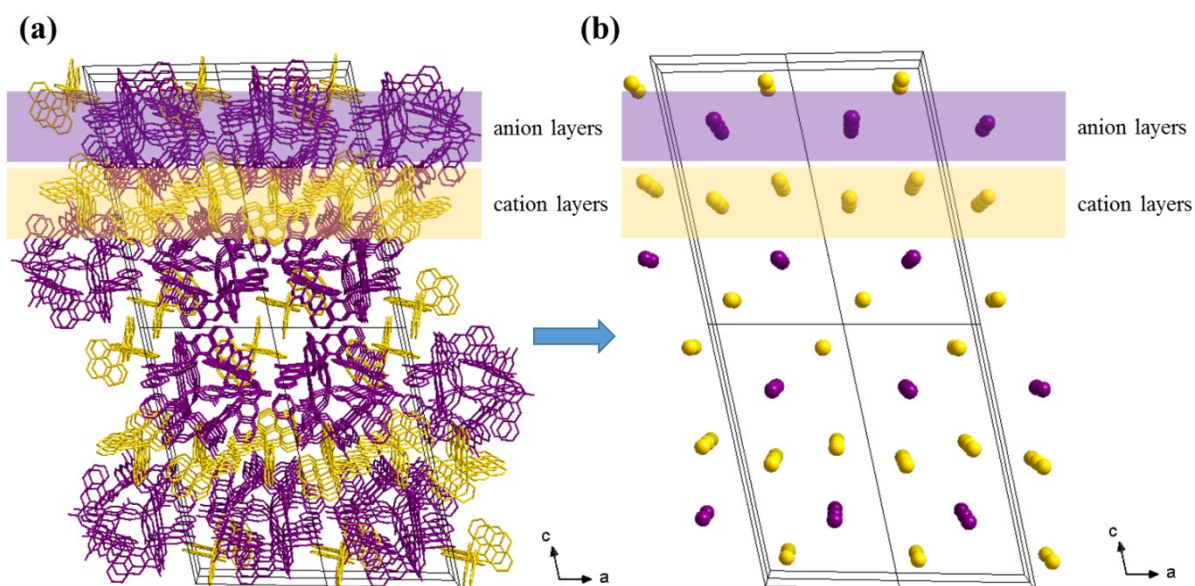

**Figure S11.** (a) Molecular packing diagram of PTC-294 co-crystals projected along the crystallographic b-axis. (b) Schematic illustration of  $\text{Ti}_4(\text{embonate})_6$ -based ionic pairs methodology with conventional parallel-type cation–anion assembly with alternating cation and anion layers.

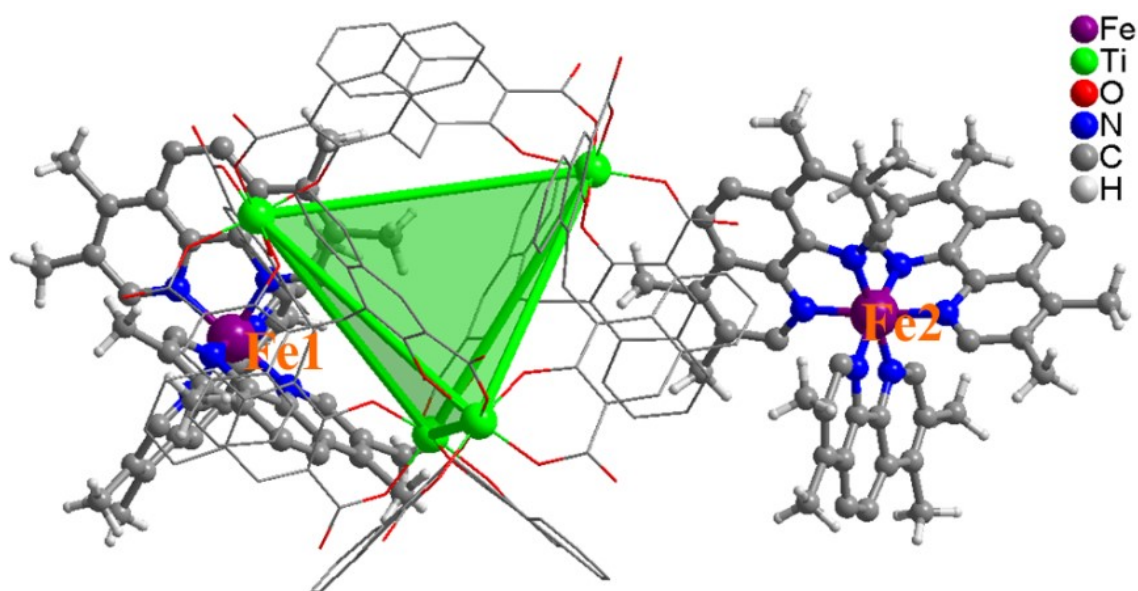

**Figure S12.** The asymmetric unit of PTC-295, showing one  $\text{Ti}_4\text{L}_6$  cage, two  $[\text{Fe}(\text{Me}_4\text{phen})_3]^{3+}$  cations and some free  $(\text{NH}_4)^+$  cations.

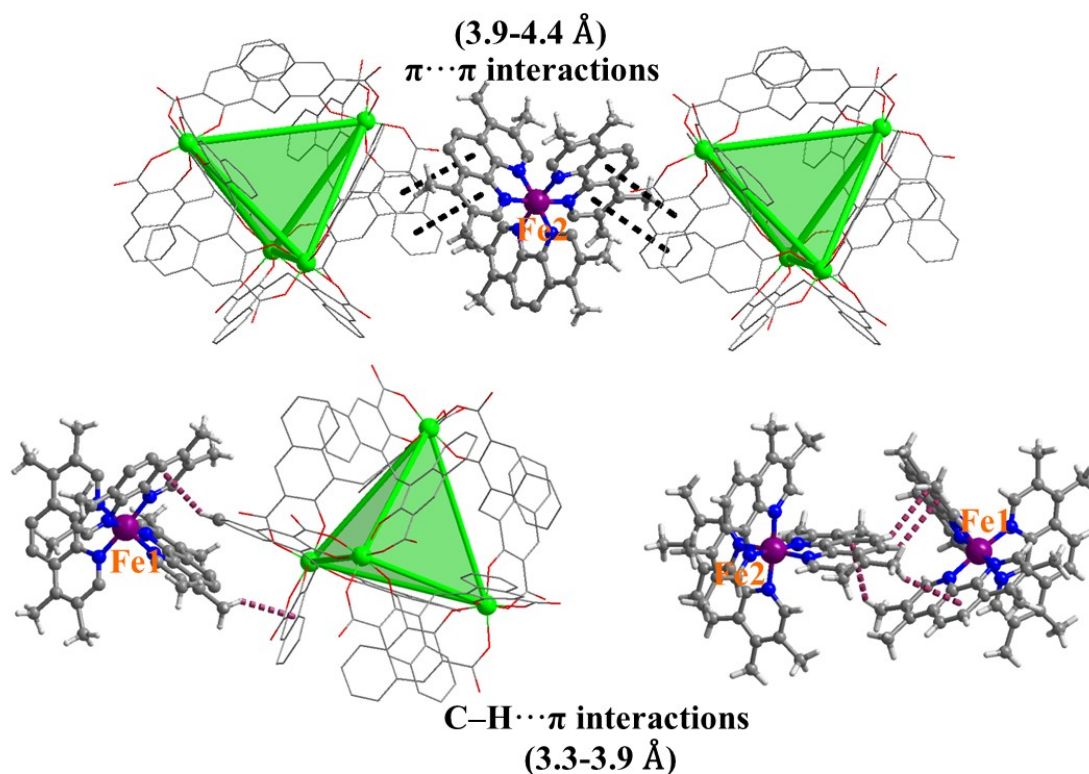

**Figure S13.** The highlighting of the  $\pi \cdots \pi$  stacking and C-H $\cdots\pi$  interactions between adjacent  $\text{Ti}_4\text{L}_6$  cage and  $[\text{Fe}(\text{Me}_4\text{phen})_3]^{3+}$  cation.

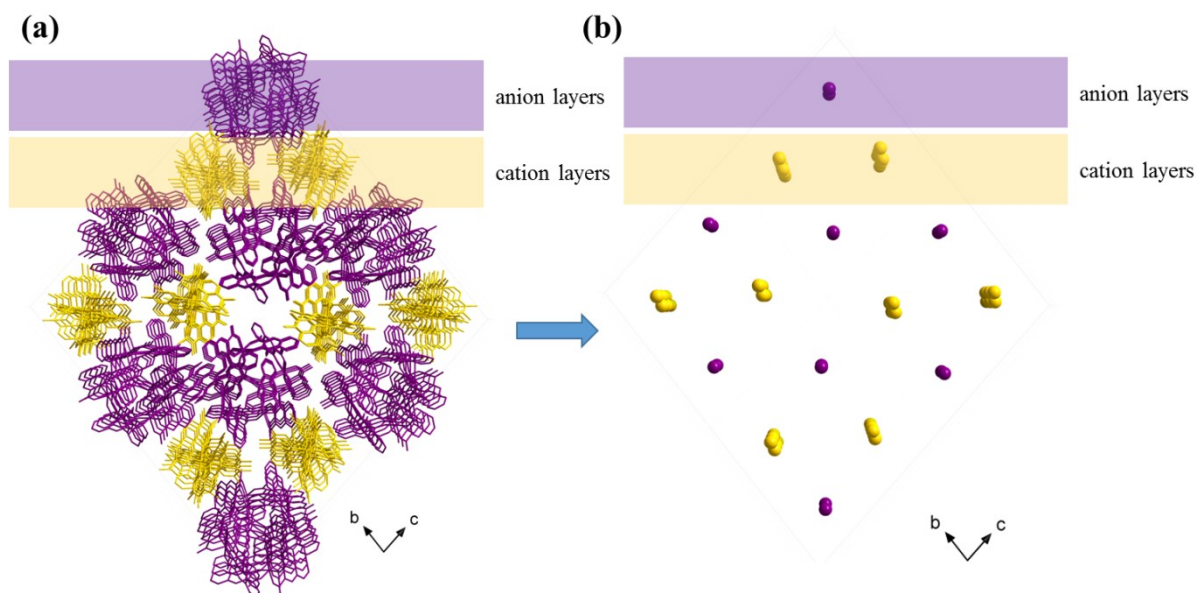

**Figure S14.** (a) Molecular packing diagram of **PTC-295** co-crystals projected along the crystallographic a-axis. (b) Schematic illustration of  $\text{Ti}_4(\text{embonate})_6$ -based ionic pairs methodology with conventional parallel-type cation-anion assembly with alternating cation and anion layers.

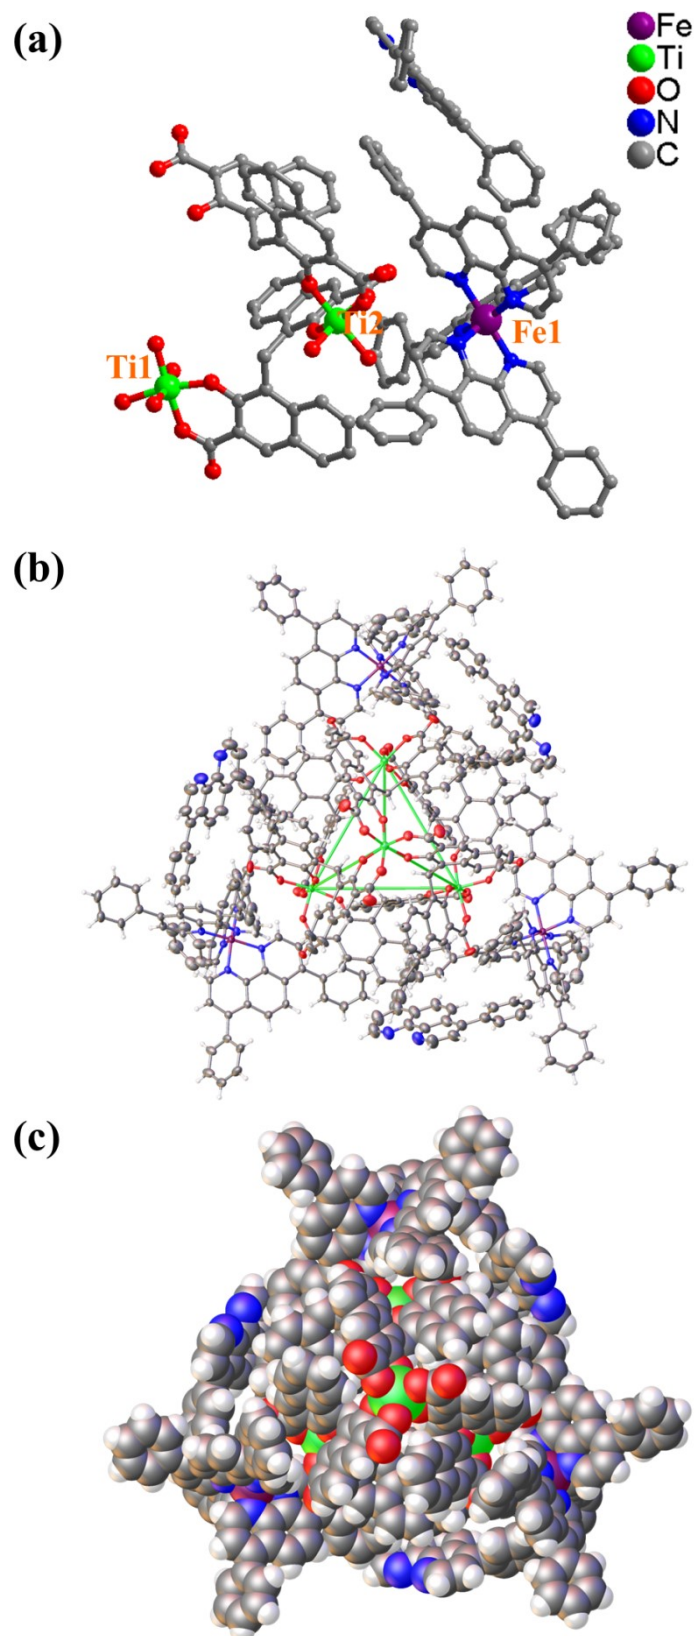

**Figure S15.** (a) The asymmetric unit of **PTC-296**, showing one third of  $\text{Ti}_4\text{L}_6$  cage and one  $[\text{Fe}(\text{Ph}_2\text{phen})_3]^{3+}$  cation, one  $\text{Ph}_2\text{phen}$  ligand and some free  $(\text{NH}_4)^+$  cations. (b) ORTEP diagram for **PTC-296** with the ellipsoids drawn at the 30% probability level. (c) Sphere packing representations of the **PTC-296**.

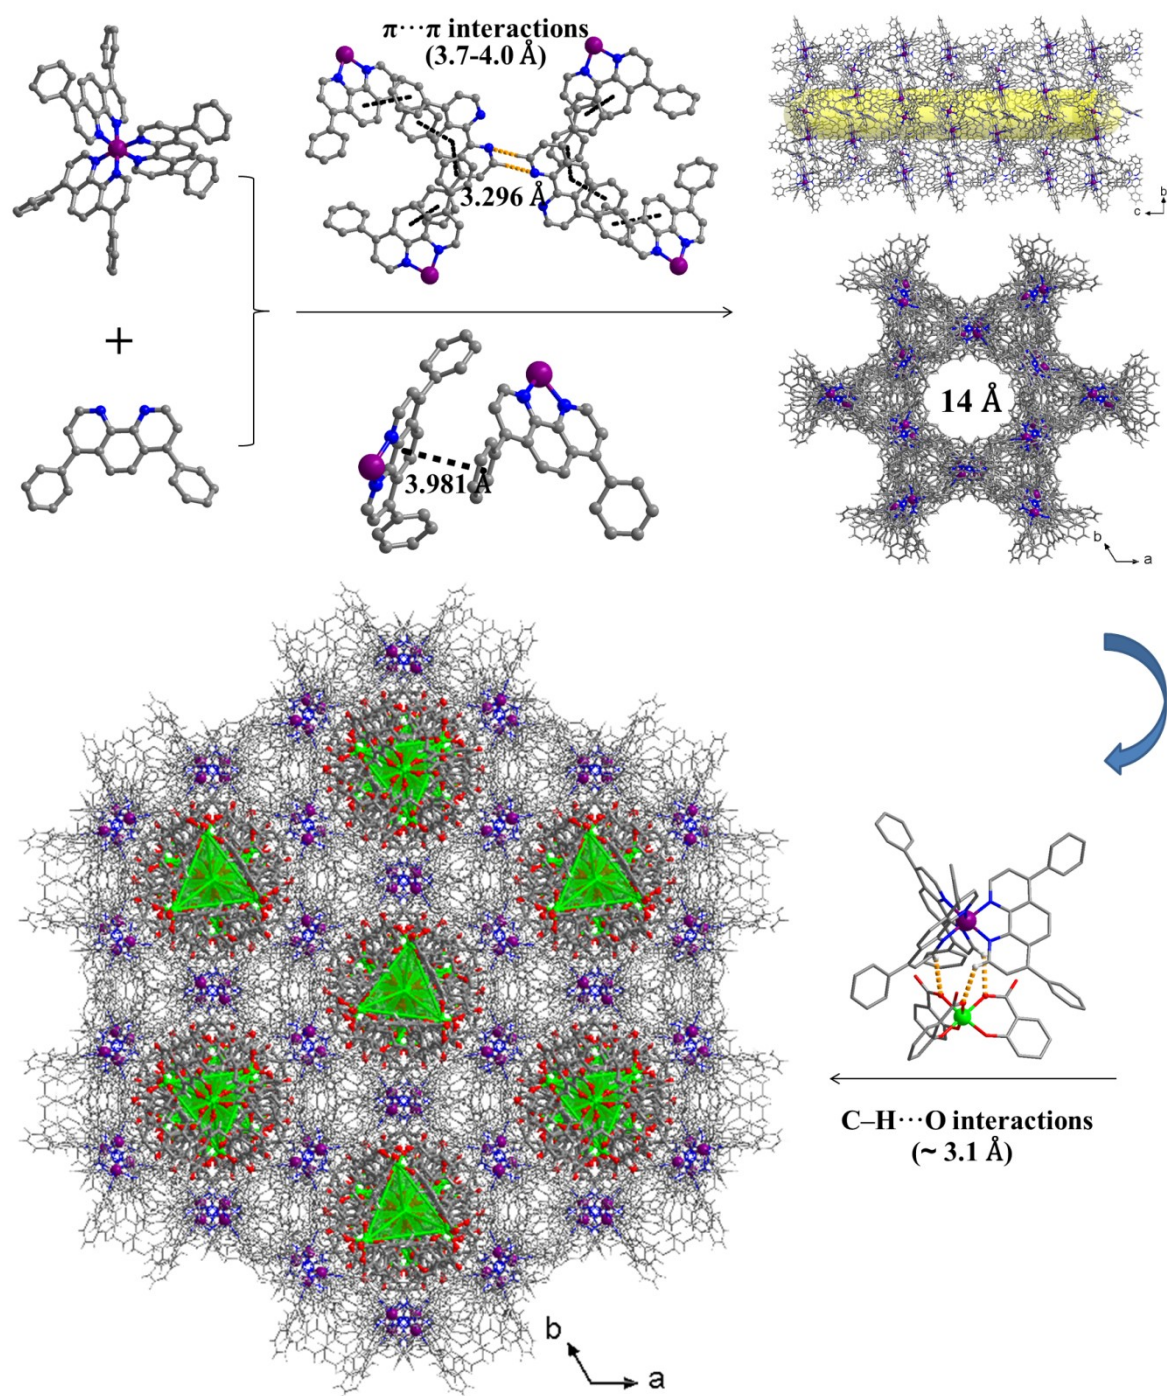

**Figure S16.** Structural assembly process of **PTC-296**. Atom color code: green, Ti; cyan, Cu; modena, Fe; red, O; blue, N; gray, C; offwhite, H.

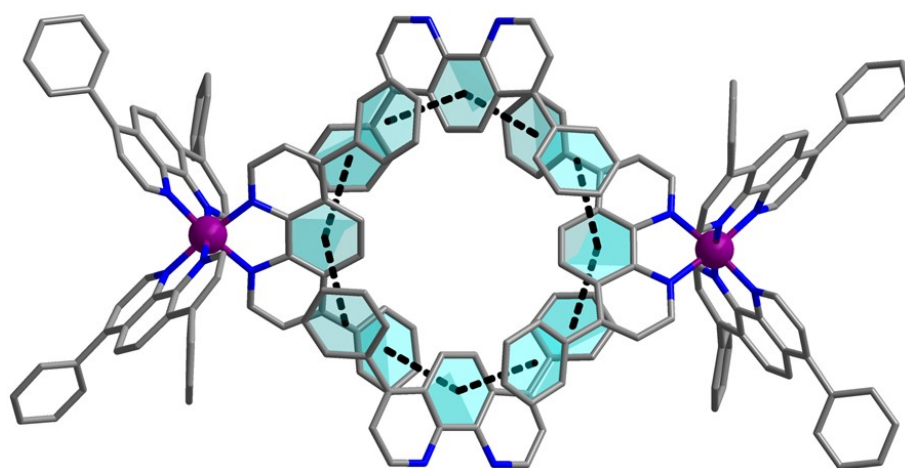

$\pi$ - $\pi$  interactions (3.7-4.0 Å)

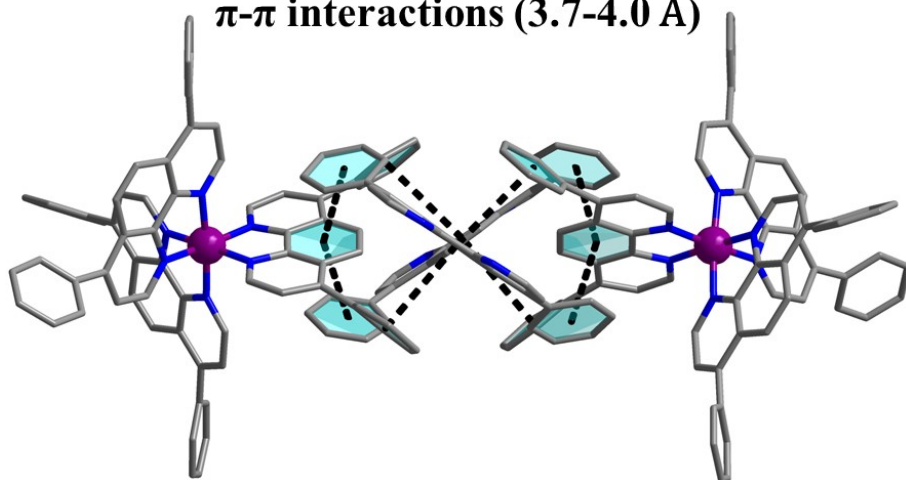

**Figure S17.** The schematic diagram of  $\pi \cdots \pi$  in PTC-296.

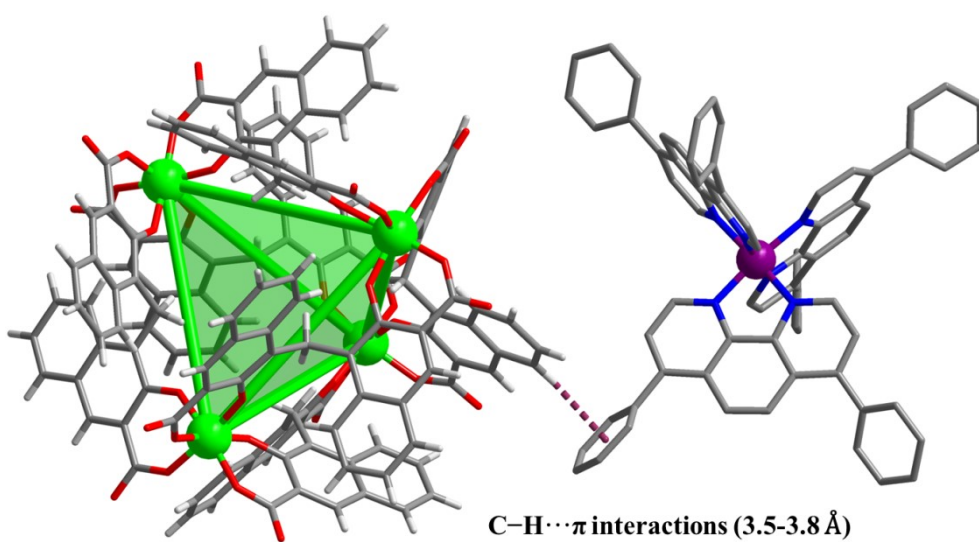

C-H $\cdots$  $\pi$  interactions (3.5-3.8 Å)

**Figure S18.** The schematic diagram of C-H $\cdots$  $\pi$  in PTC-296.

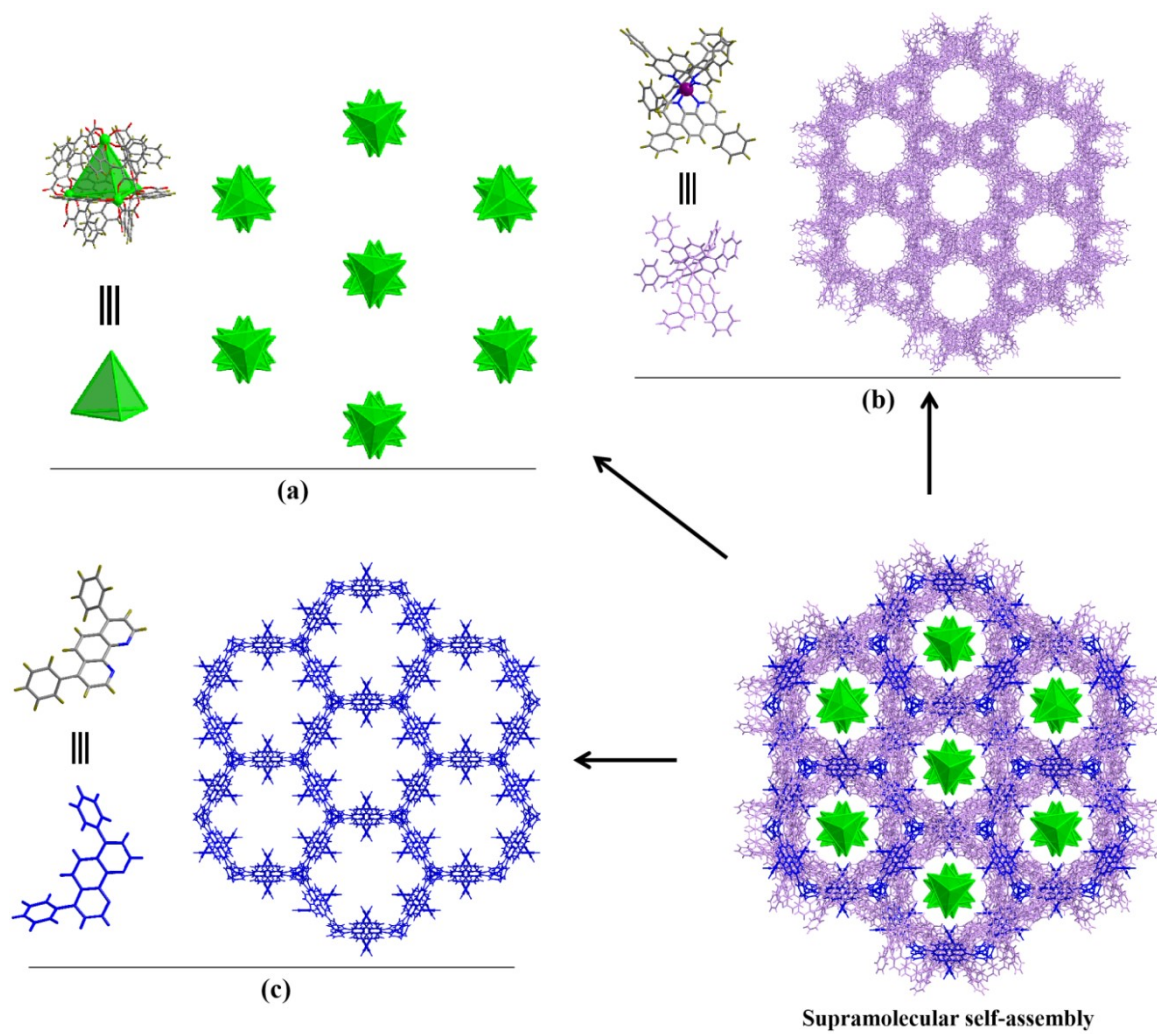

**Figure S19.** Illustration the intergration of  $\text{Ti}_4\text{L}_6$  cage,  $\text{Ph}_2\text{phen}$  ligand and  $[\text{Fe}(\text{Ph}_2\text{phen})_3]^{3+}$  unit into a 3D supramolecular architecture of **PTC-296**.

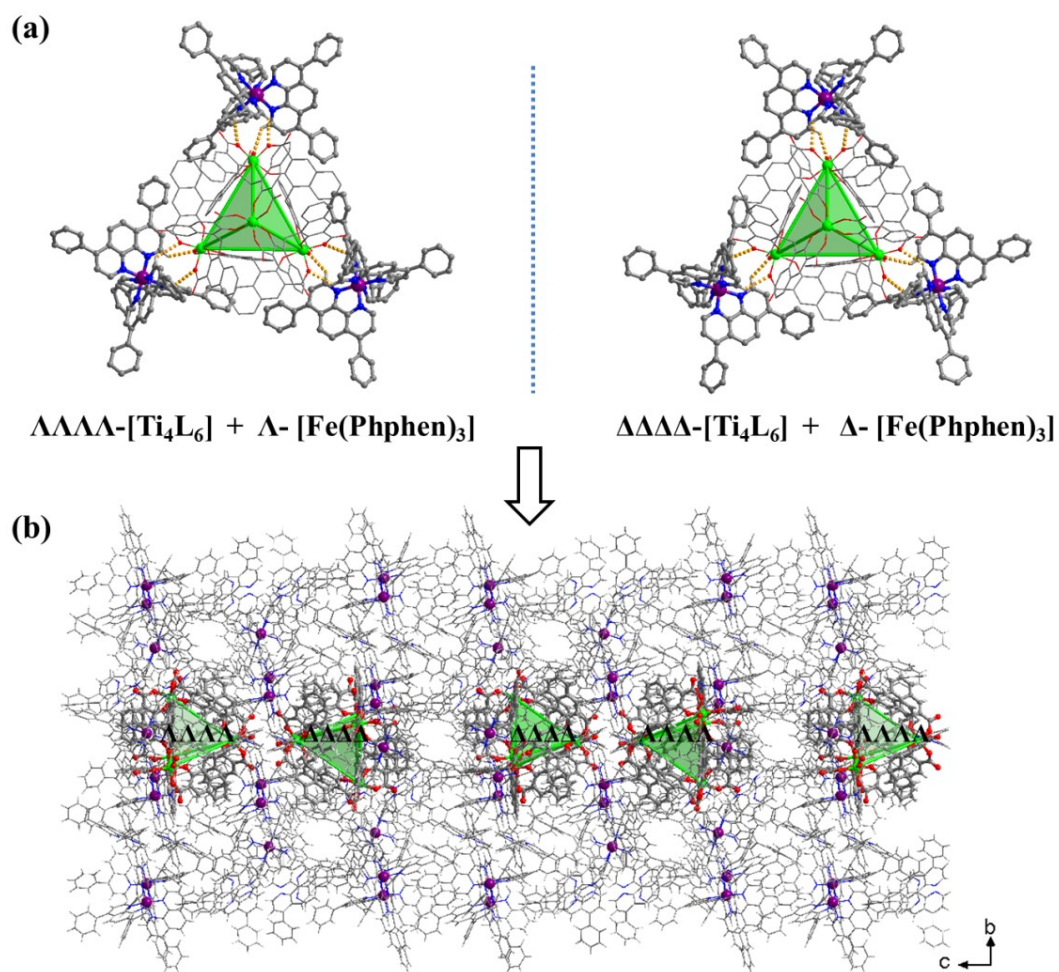

**Figure S20.** (a) Matching between the calixarene-like oxygen vertices of the Ti<sub>4</sub>L<sub>6</sub> cage and the [Fe(Ph<sub>2</sub>phen)<sub>3</sub>]<sup>3+</sup> unit through C–H···O hydrogen bonds in **PTC-296**; (b) the 3D packing superstructure of **PTC-296** along the a-axis direction.

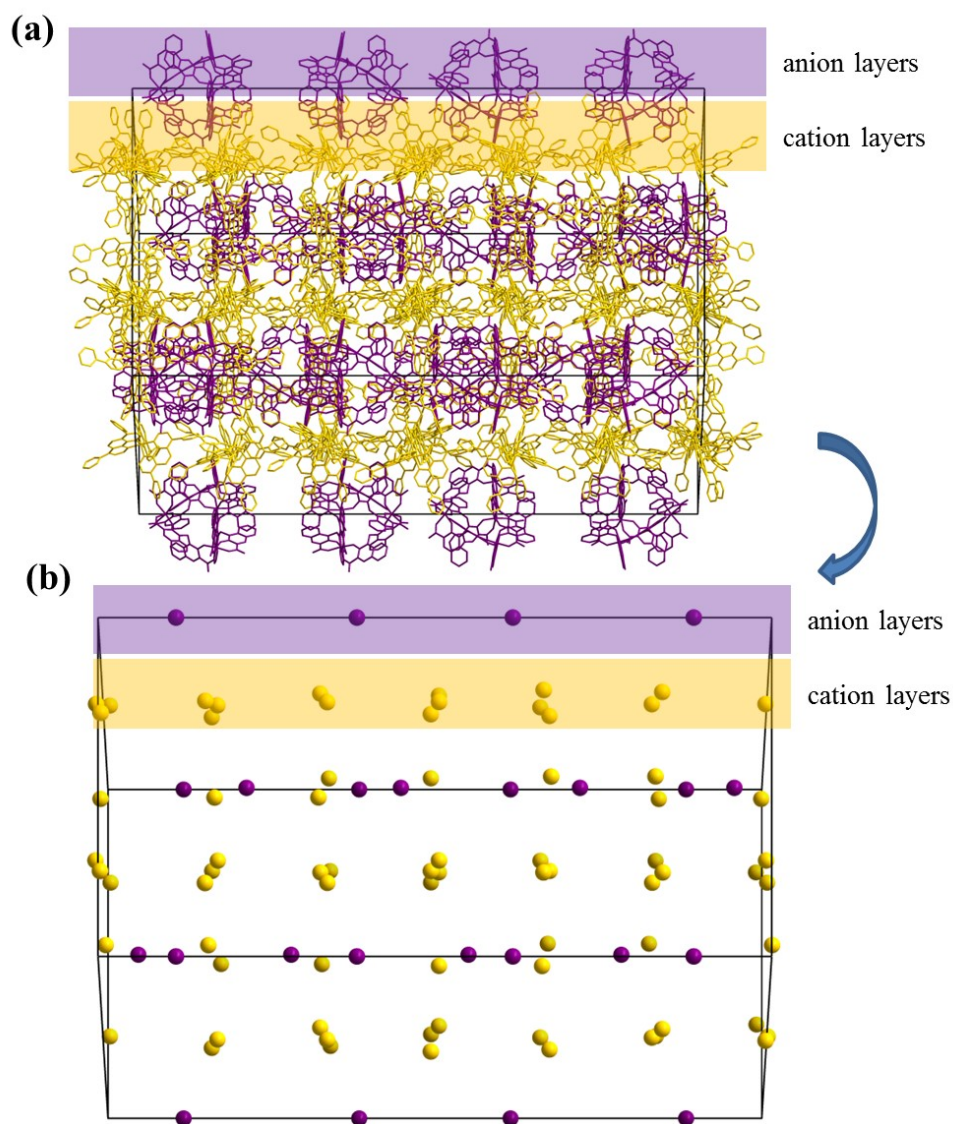

**Figure S21.** (a) Molecular packing diagram of **PTC-296** co-crystals projected. (b) Schematic illustration of  $\text{Ti}_4(\text{embonate})_6$ -based ionic pairs methodology with conventional parallel-type cation–anion assembly with alternating cation and anion layers.

### 3. The SEM-Mapping Spectra of PTCs

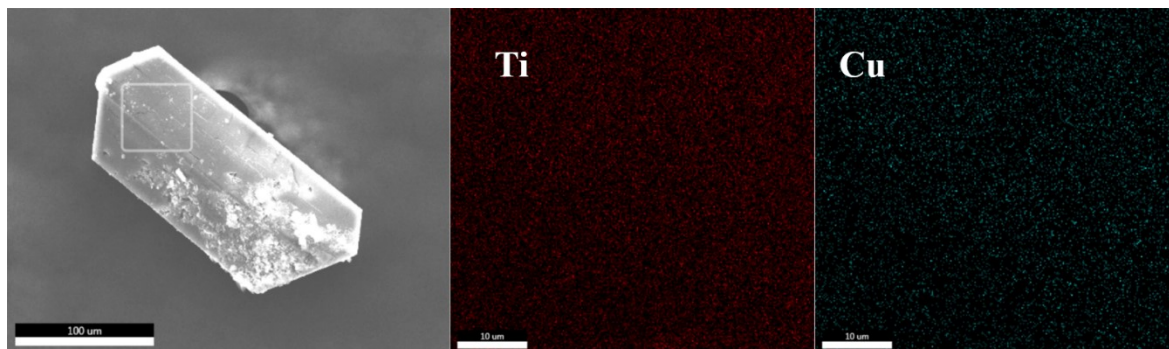

**Figure S22.** The SEM-mapping spectra of **PTC-293**. From left to right are crystal appearance, titanium, and copper elements.

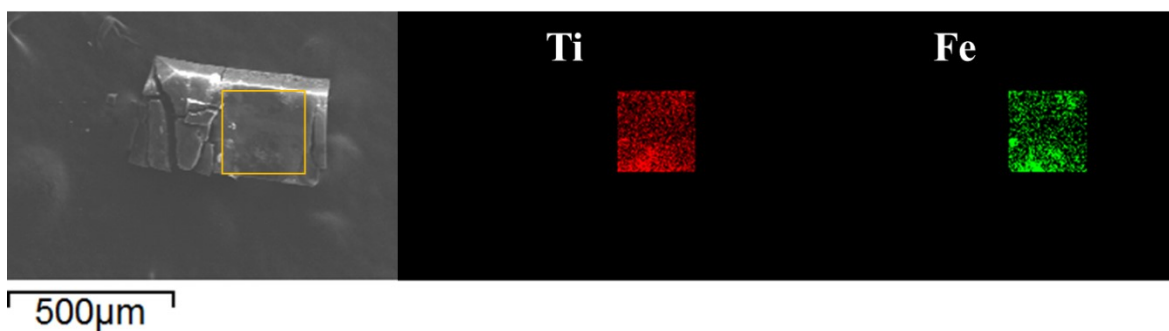

**Figure S23.** The SEM-mapping spectra of **PTC-294**. From left to right are crystal appearance, titanium, and iron elements.

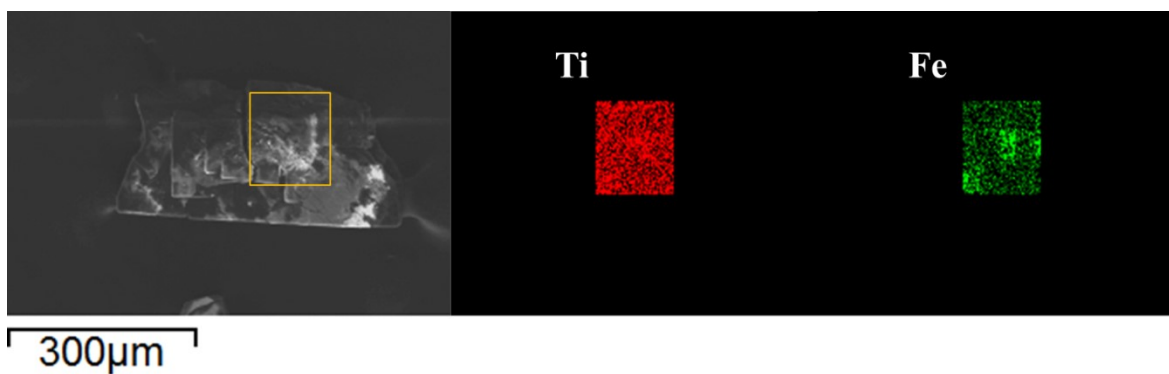

**Figure S24.** The SEM-mapping spectra of **PTC-295**. From left to right are crystal appearance, titanium, and iron elements.

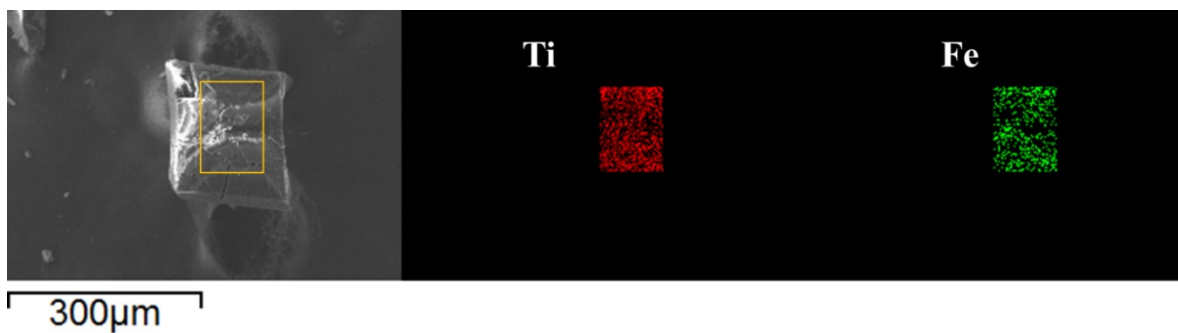

**Figure S25.** The SEM-mapping spectra of **PTC-296**. From left to right are crystal appearance, titanium, and iron elements.

#### 4. The EDS Spectra of PTCs

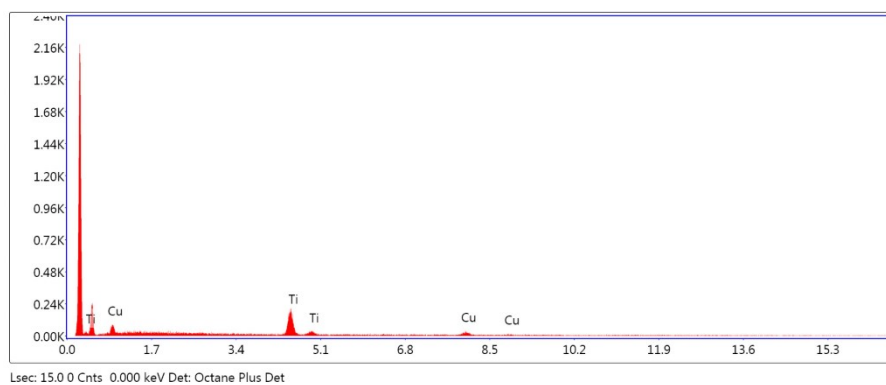

**Figure S26.** The EDS spectrum of compound **PTC-293**.

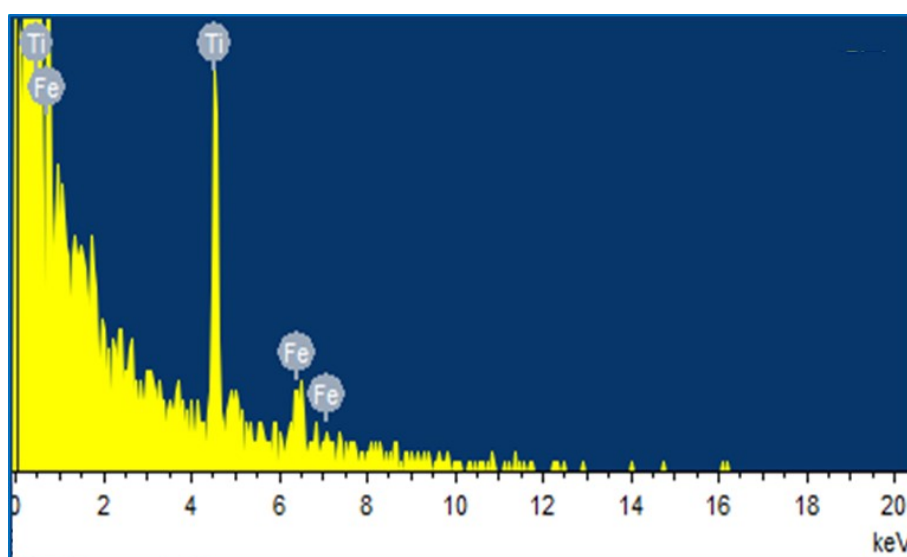

**Figure S27.** The EDS spectrum of compound **PTC-294**.

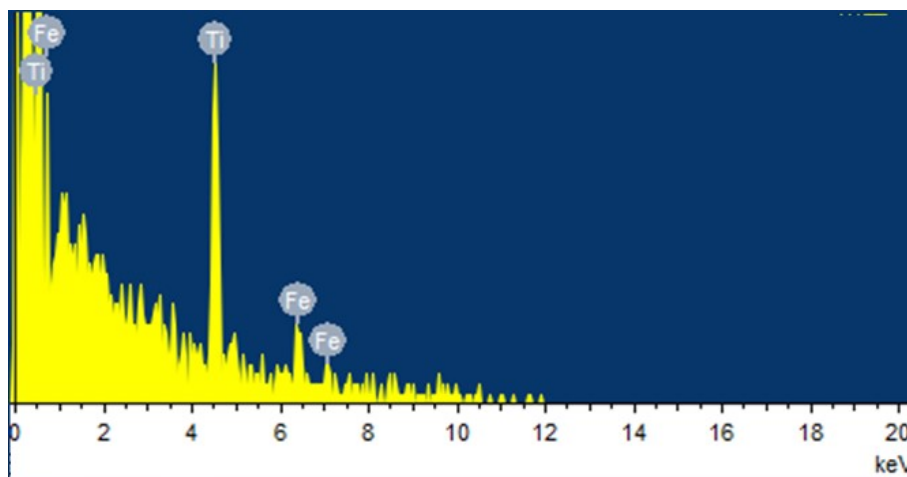

**Figure S28.** The EDS spectrum of compound **PTC-295**.

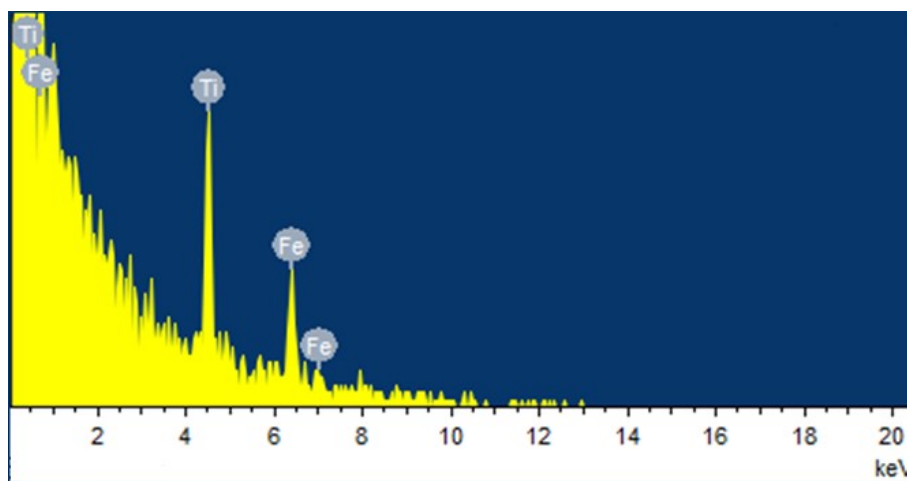

**Figure S29.** The EDS spectrum of compound **PTC-296**.

## 5. The UV-Vis Spectra of PTCs

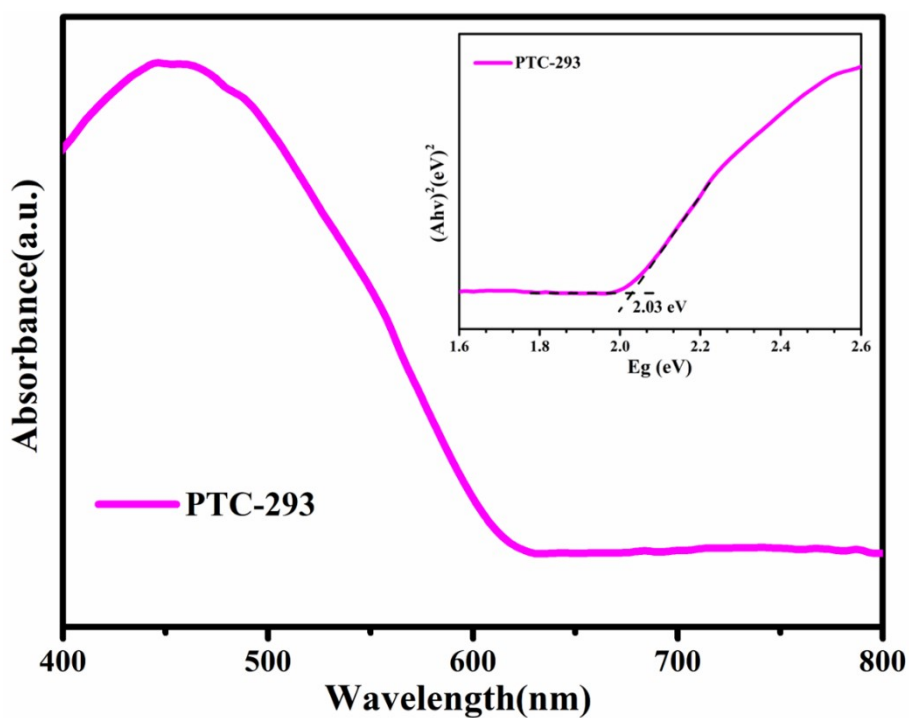

Figure S30. The solid-state UV absorption spectra of PTC-293.

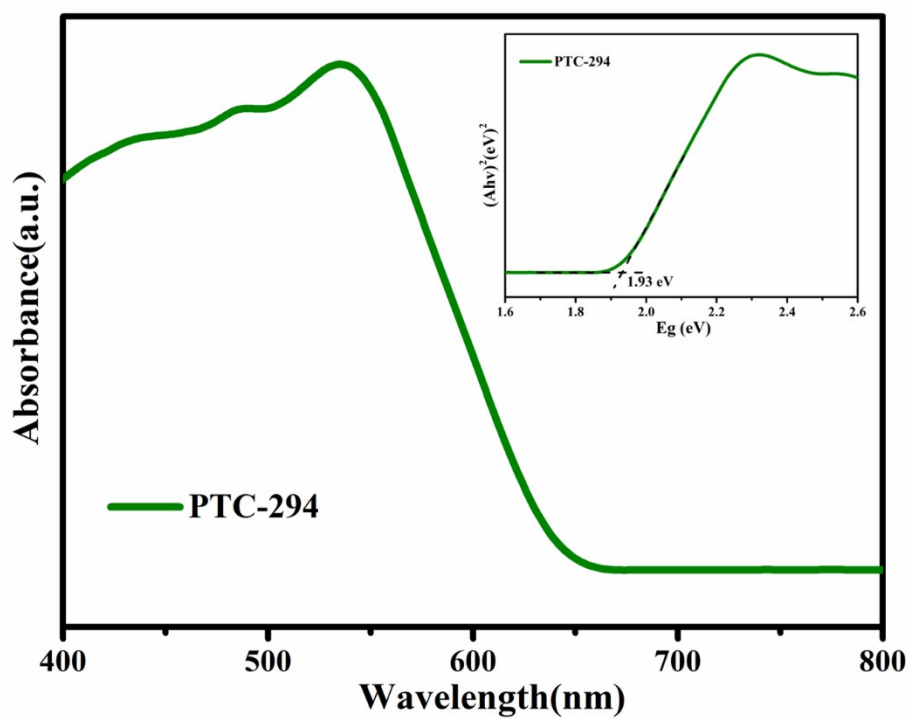

Figure S31. The solid-state UV absorption spectra of PTC-294.

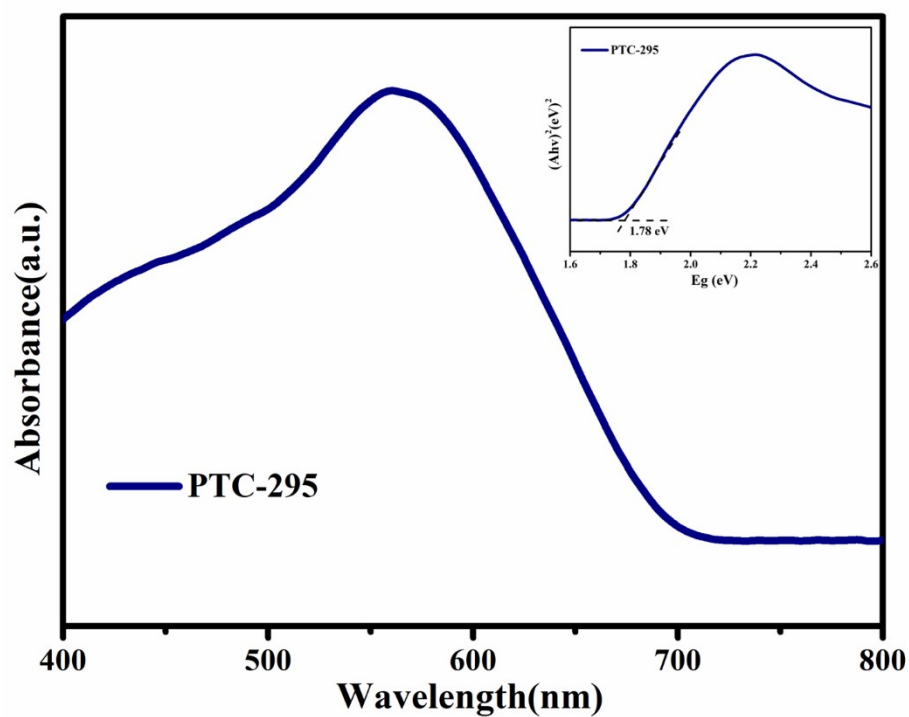

Figure S32. The solid-state UV absorption spectra of PTC-295.

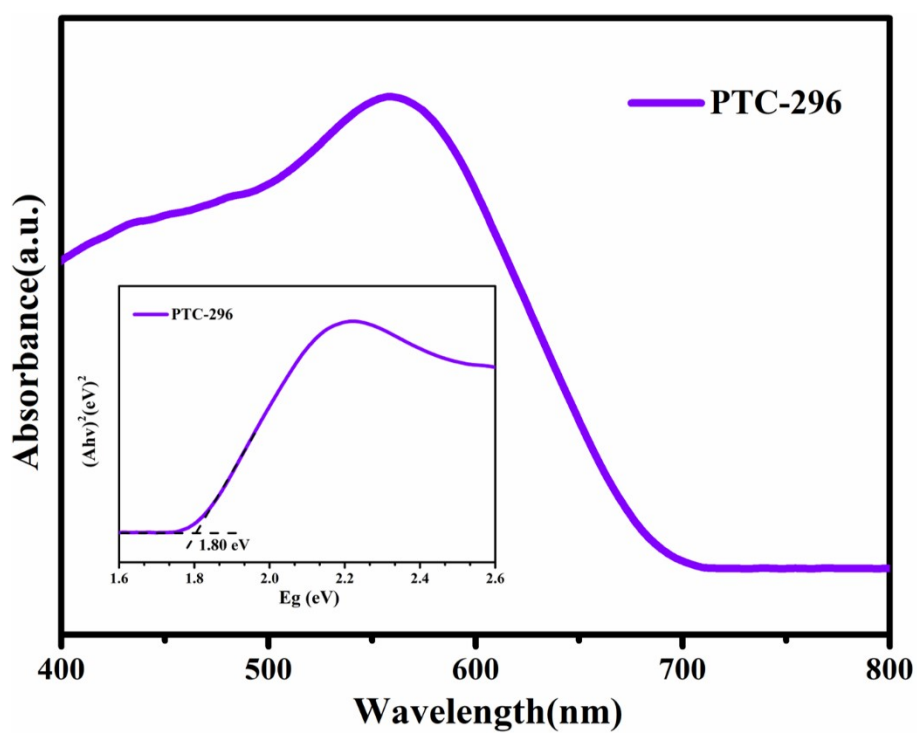

Figure S33. The solid-state UV absorption spectra of PTC-296.

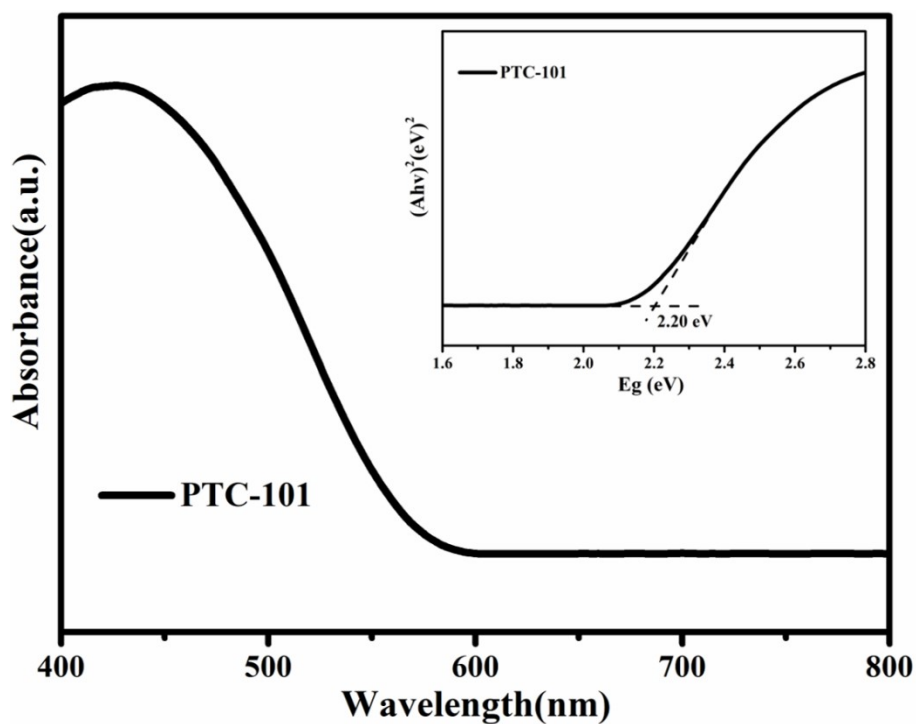

**Figure S34.** The solid-state UV absorption spectra of PTC-101.

## 6. The FT-IR Spectra of PTCs

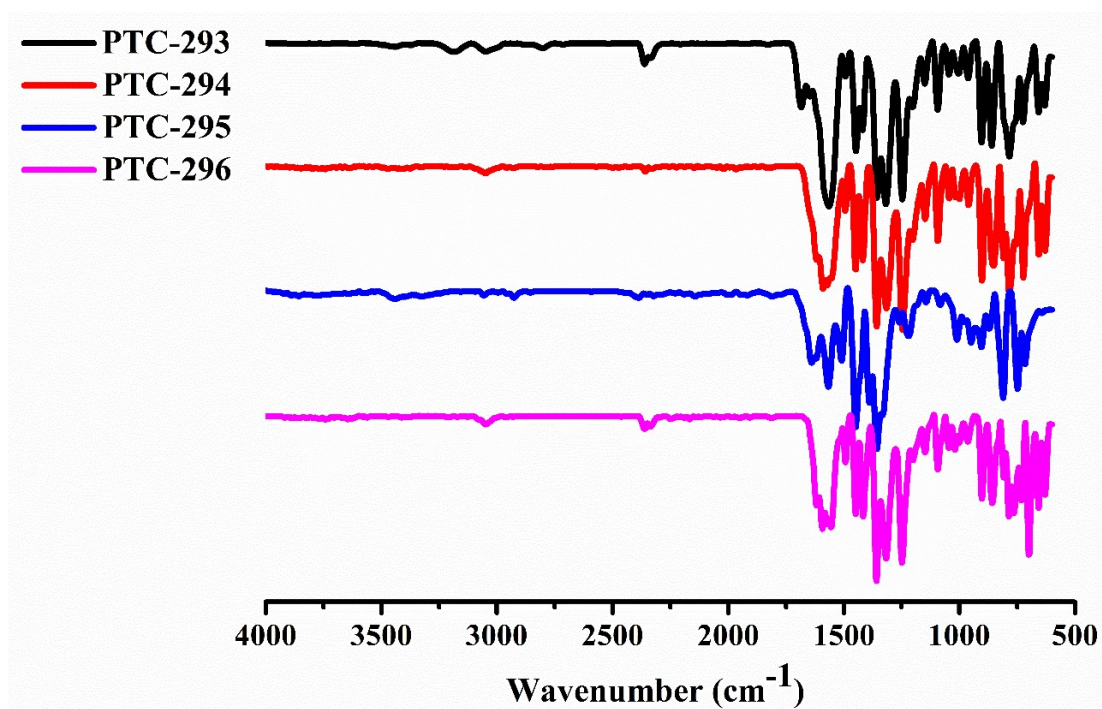

**Figure S35.** The FT-IR spectra of compounds PTC-293 to PTC-296.

## 7. The TGA curve of PTCs

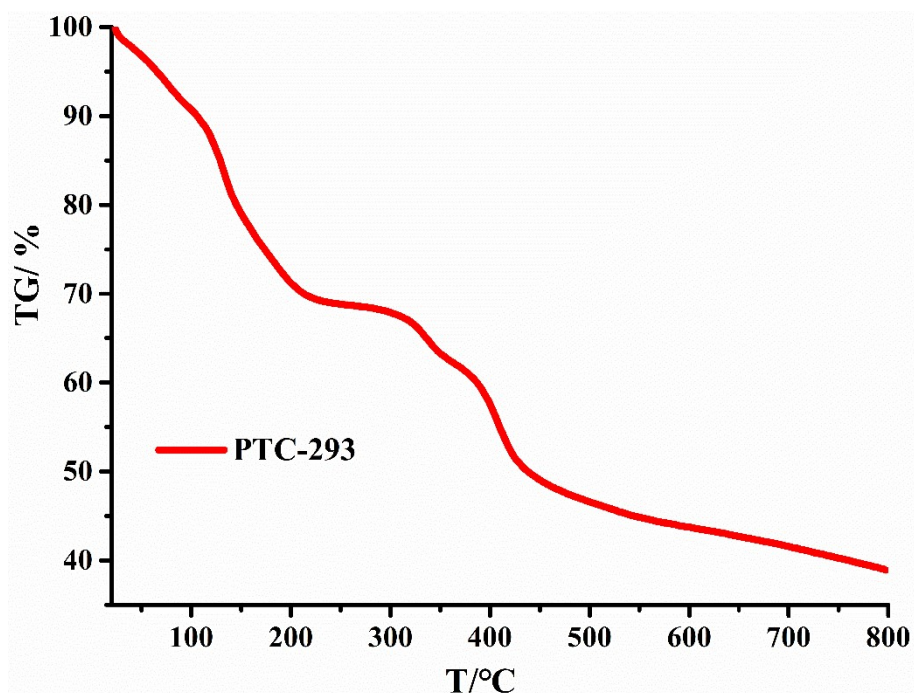

Figure S36. The TGA curve of PTC-293.

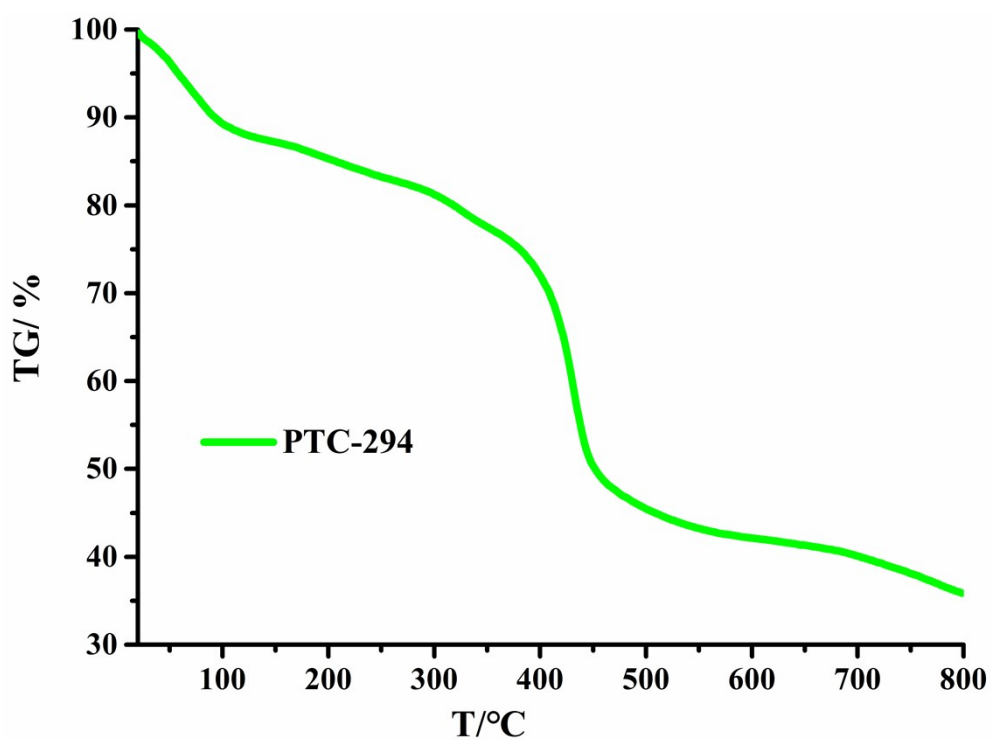

Figure S37. The TGA curve of PTC-294.

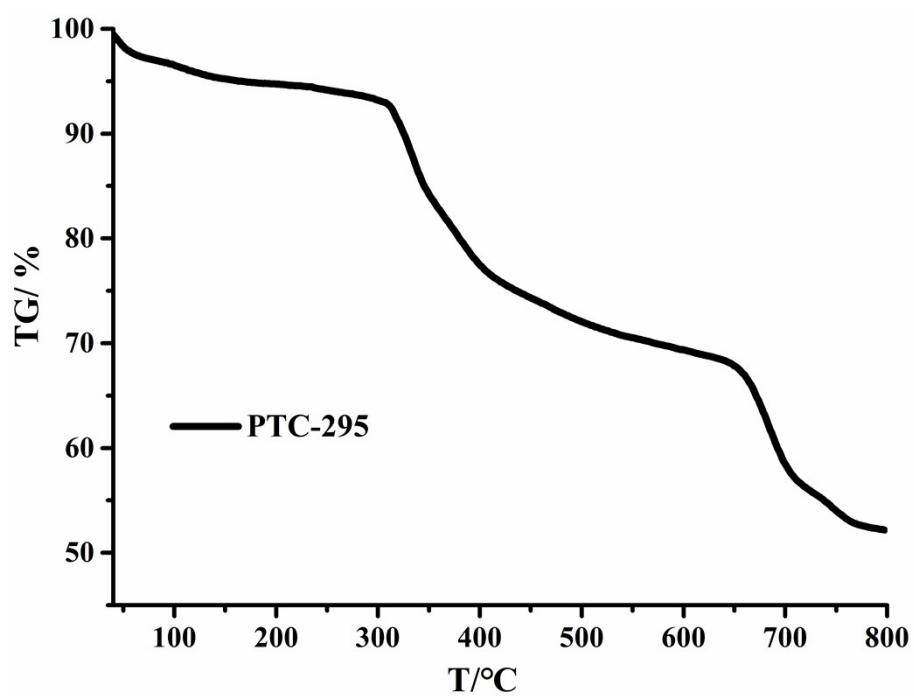

Figure S38. The TGA curve of PTC-295.

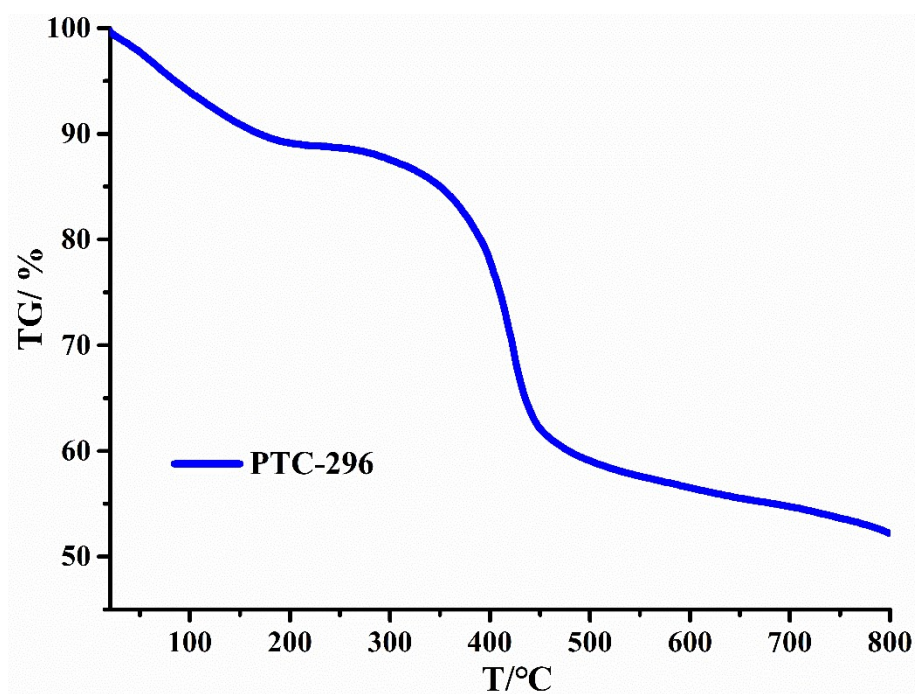

Figure S39. The TGA curve of PTC-296.

## 8. The XPS Spectra of PTCs

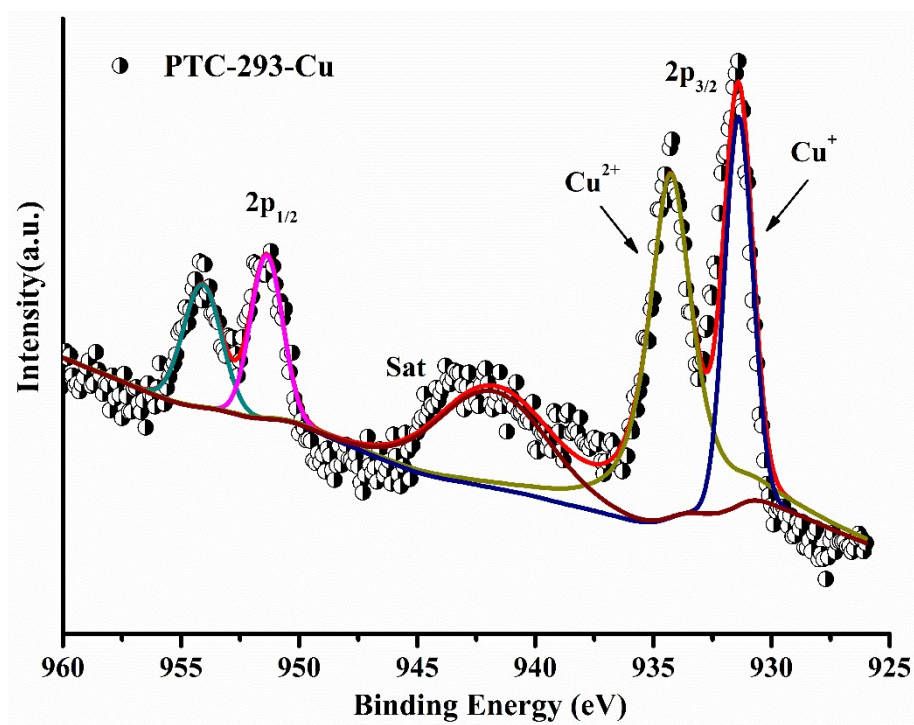

Figure S40. The XPS spectra of PTC-293-Cu.

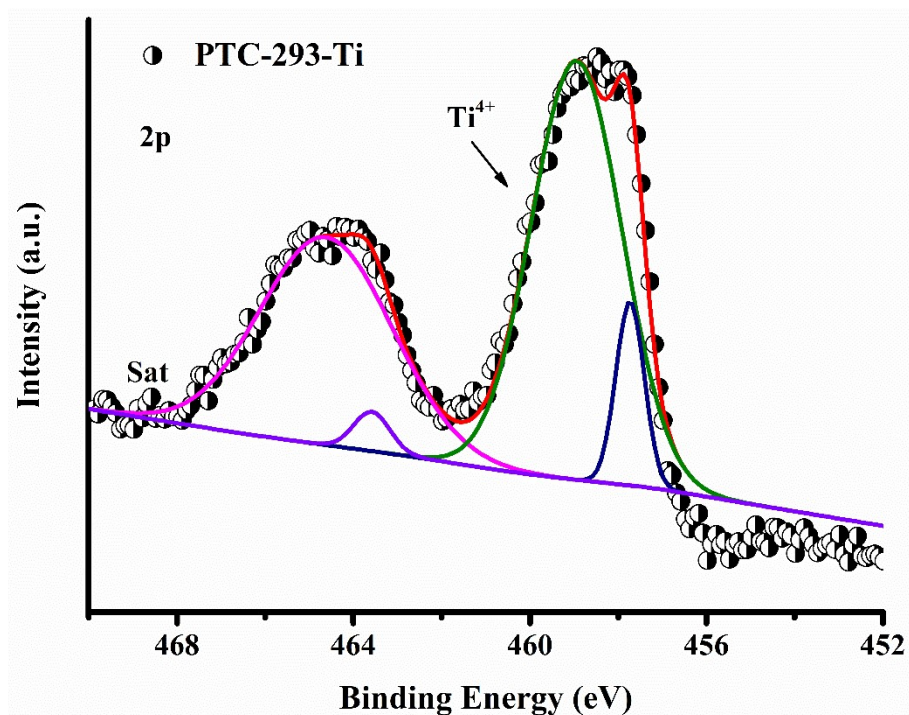

Figure S41. The XPS spectra of PTC-293-Ti.

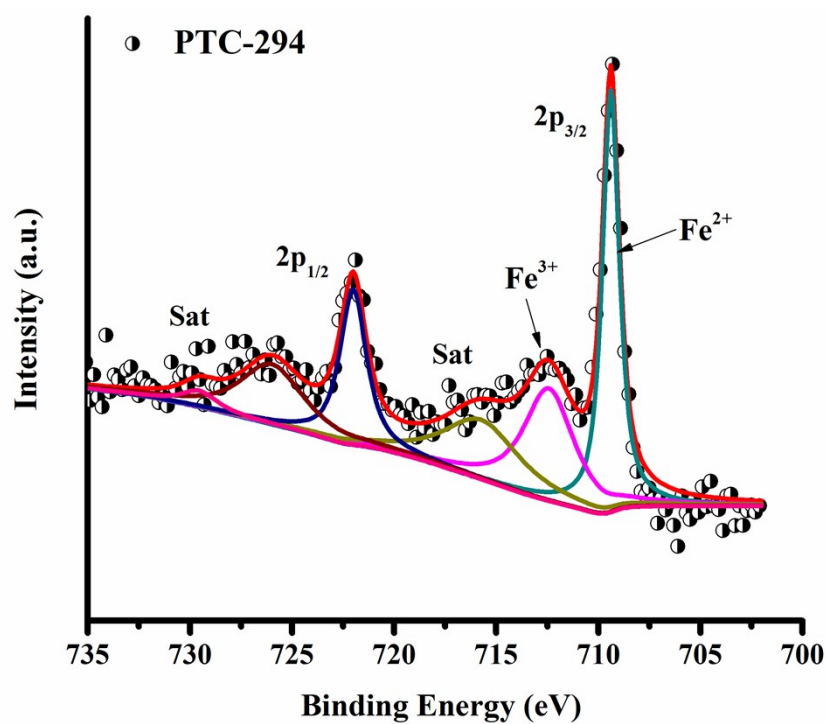

Figure S42. The XPS spectra of PTC-294.

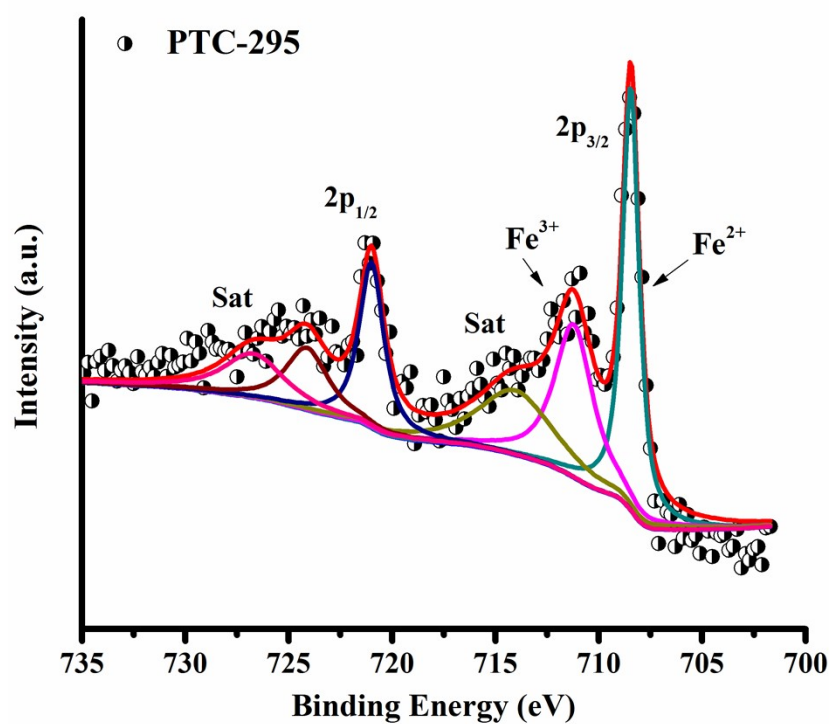

Figure S43. The XPS spectra of PTC-295.

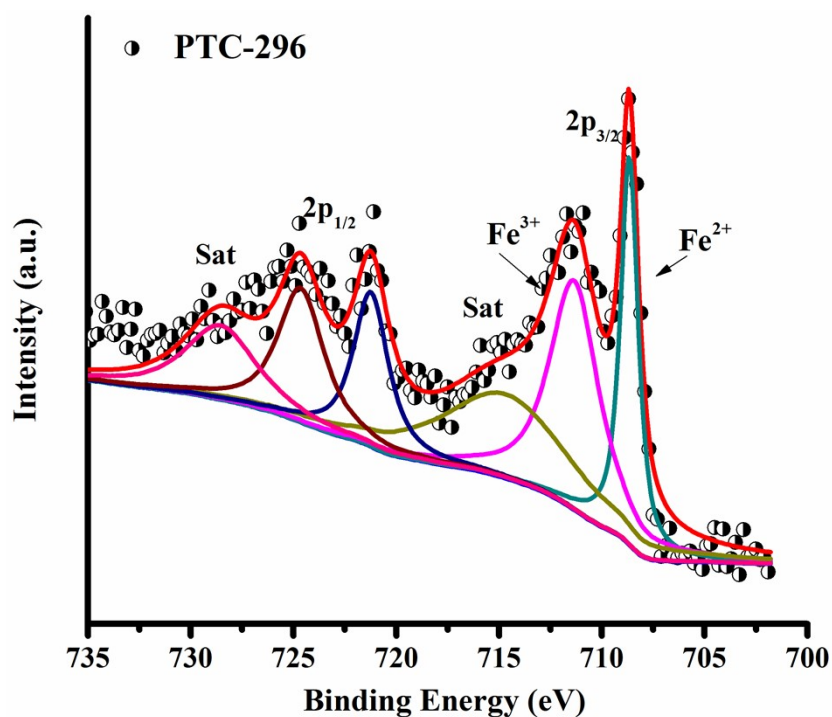

**Figure S44.** The XPS spectra of PTC-296.

X-ray photoelectronspectroscopy (XPS) was used to characterize the Fe oxidation state. It has been shown in previous studies that the peak positions of Fe  $2p_{1/2}$  and Fe  $2p_{3/2}$  depend on the ionic states of Fe. In **PTC-294**, all Fe is in the  $Fe^{2+}$  state, while in **PTC-295** and **PTC-296**, iron is in mixed price state, but most of them are  $Fe^{3+}$  valency. This result is consistent with the raw material of iron.

## 9. The NLO Property and NICS(0) Method Studies of PTCs

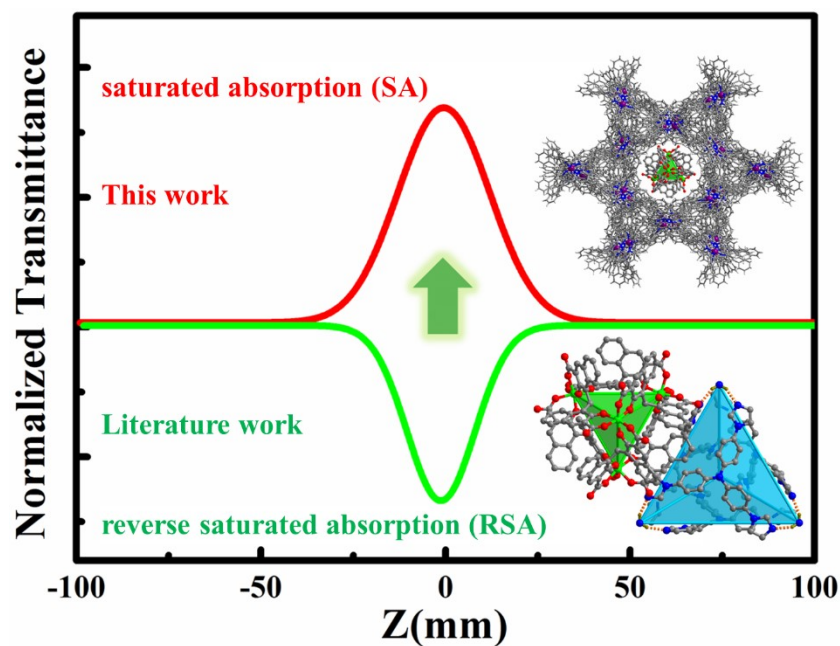

**Figure S45.**  $\text{Ti}_4(\text{embonate})_6$ -based ionic pairs with tunable nonlinear optics in our reported work and this work.<sup>2</sup>

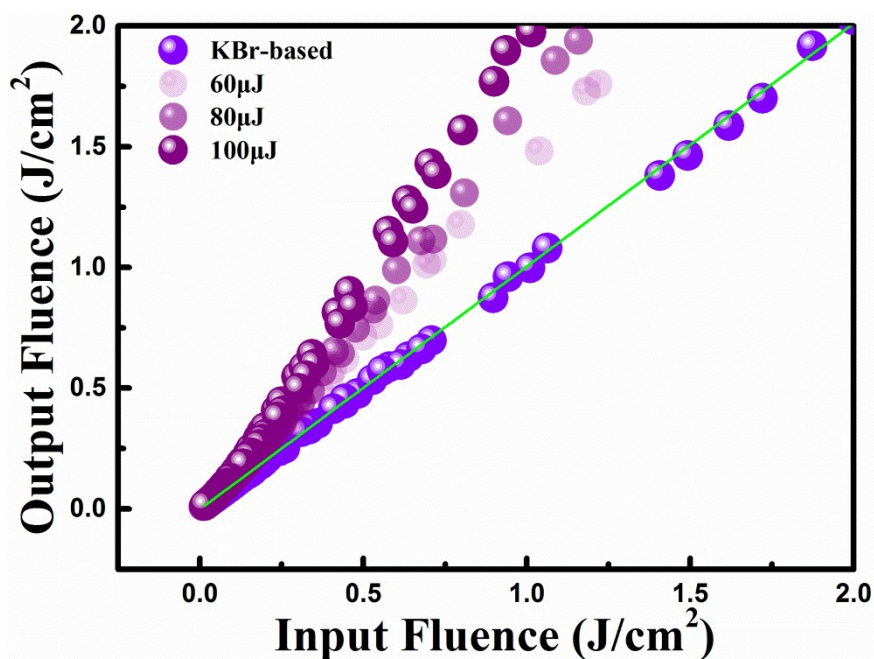

**Figure S46.** The curves of output fluence versus input fluence for two thin films.

The curves of output fluence versus input fluence of KBr-based thin film and KBr-based **PTC-296** thin film reveal that the output fluence linearly increased at low incident fluence (Figure S46). But at high-incident fluence, the output fluence deviated from linearity represent typical behavior of NLO response for KBr-based **PTC-296** thin film.

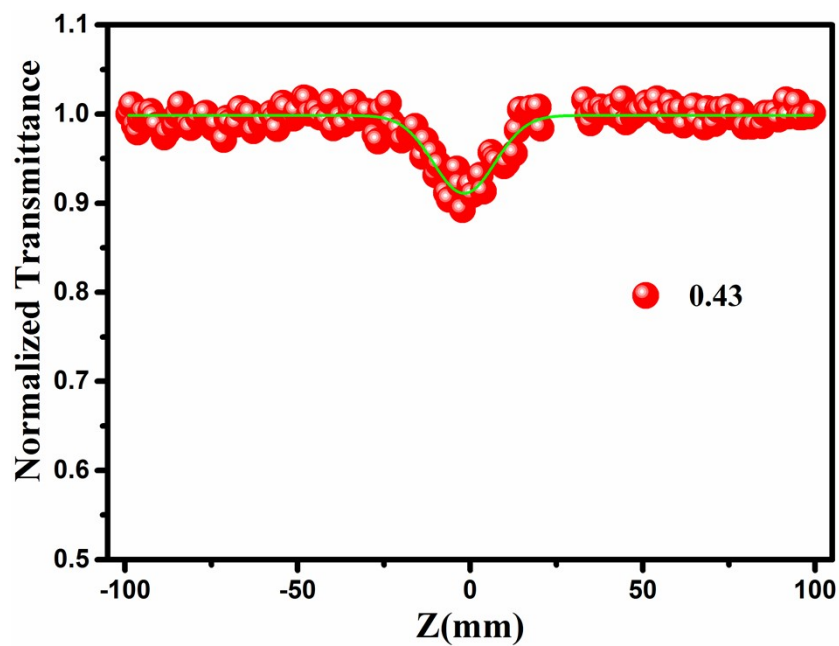

**Figure S47.** The open-aperture Z-scan results at 532 nm for KBr-based **PTC-293** thin film.

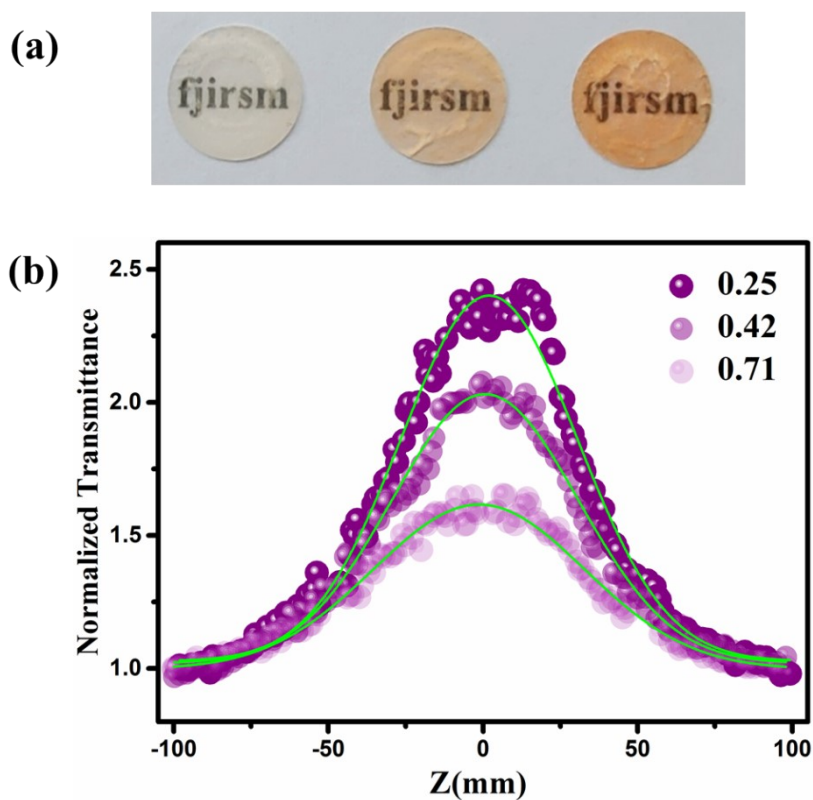

**Figure S48.** The open-aperture Z-scan results at 532 nm for KBr-based **PTC-294** thin film and the linear transmittance ( $T_0$ ) was set.

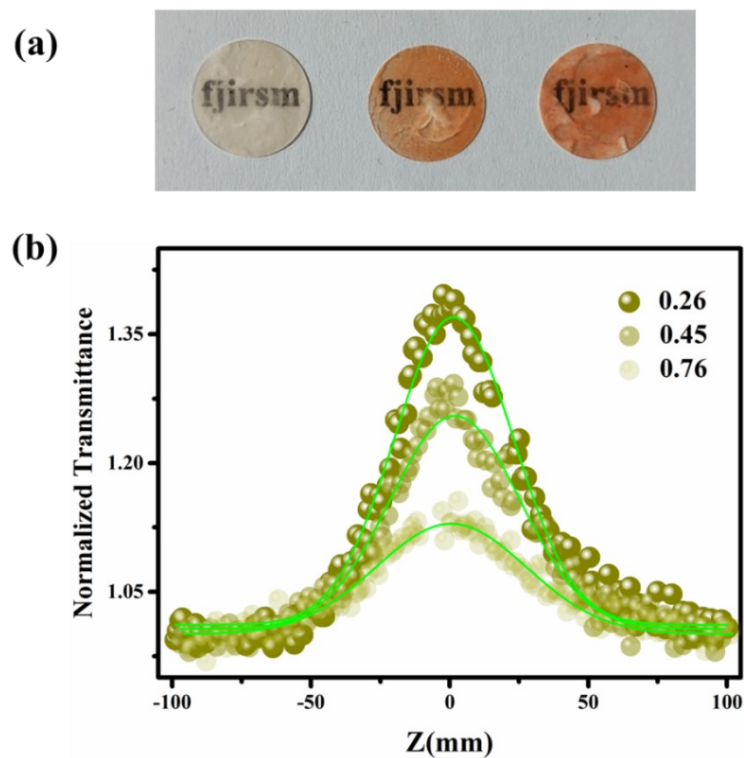

**Figure S49.** The open-aperture Z-scan results at 532 nm for KBr-based **PTC-295** thin film and the linear transmittance ( $T_0$ ) was set.

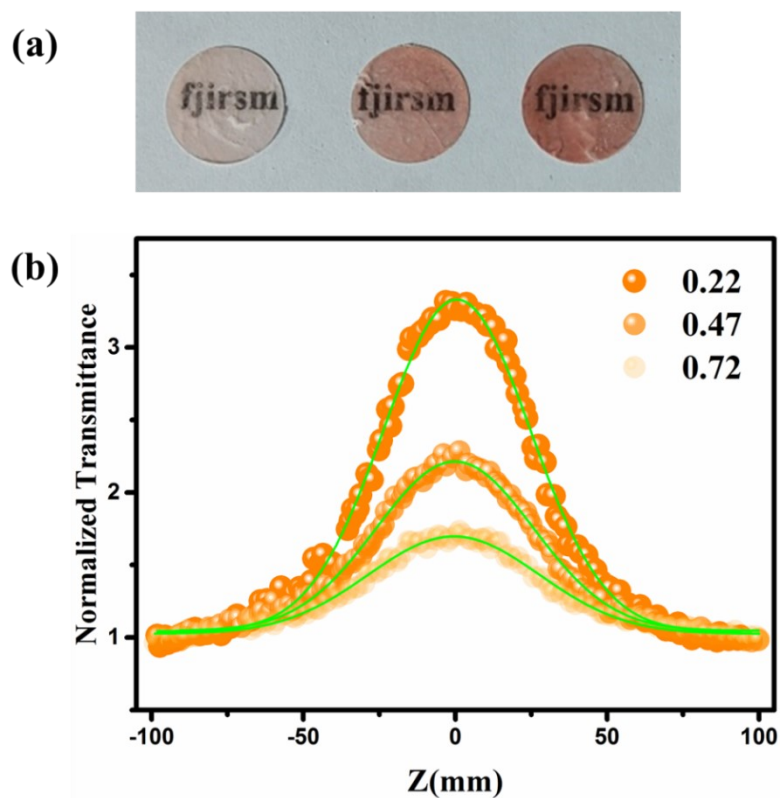

**Figure S50.** The open-aperture Z-scan results at 532 nm for KBr-based **PTC-296** thin film and the linear transmittance ( $T_0$ ) was set.

**Table S1.** Linear, NLO data and NICS(0) values of the samples.

|                | Linear<br>Transmittance<br>(T <sub>0</sub> ) | Normalized<br>Transmittance | Nonlinear<br>Absorption<br>Coefficients<br>( $\beta(\text{m/W} \cdot 10^{-10})$ ) | Nucleus-Independent<br>Chemical Shift<br>(NICS(0)) |
|----------------|----------------------------------------------|-----------------------------|-----------------------------------------------------------------------------------|----------------------------------------------------|
| <b>PTC-293</b> | 0.43                                         | 0.91                        | 6.00                                                                              | -17.19                                             |
| <b>PTC-294</b> | 0.71                                         | 1.71                        | -11.50                                                                            | -18.42                                             |
| <b>PTC-295</b> | 0.45                                         | 1.29                        | -8.30                                                                             | -18.46                                             |
| <b>PTC-296</b> | 0.47                                         | 2.28                        | -16.10                                                                            | -19.37                                             |

To test the aromaticity of the selected series of 1,10-phenanthroline type ligands we calculated the Nucleus-Independent Chemical Shift (NICS) values, which has become the most widely applied index to assess aromaticity due to its simplicity and efficiency.<sup>3-5</sup> NICS(0) values are defined as the value of absolute shielding observed at a ring center. Positive NICS(0) values denote antiaromaticity and negative NICS(0) values indicate the presence of aromatic character.

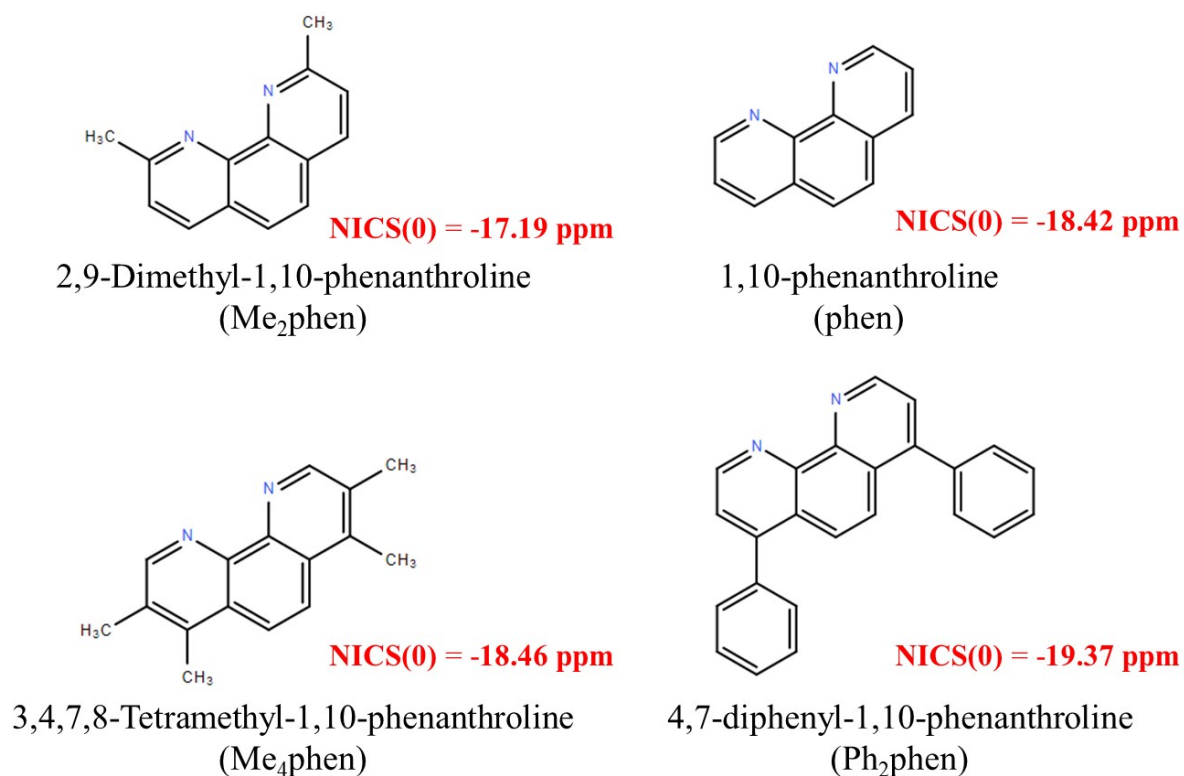**Figure S51.** The NICS(0) values for selected 1,10-phenanthroline type ligands.

## 10. Crystallography Data

**Table S2.** Crystallographic Data and Structure Refinement Details for **PTC-293** to **PTC-296**.

| Compound                            | PTC-293                                                           | PTC-294                                                                      | PTC-295                                                                      | PTC-296                                                                      |
|-------------------------------------|-------------------------------------------------------------------|------------------------------------------------------------------------------|------------------------------------------------------------------------------|------------------------------------------------------------------------------|
| CCDC                                | 2107093                                                           | 2107094                                                                      | 2107095                                                                      | 2107096                                                                      |
| Formula                             | $\text{C}_{166}\text{H}_{96}\text{CuN}_4\text{O}_{36}\text{Ti}_4$ | $\text{C}_{225}\text{H}_{157}\text{Fe}_2\text{N}_{17}\text{O}_{42}\text{Ti}$ | $\text{C}_{250}\text{H}_{204}\text{Fe}_2\text{N}_{16}\text{O}_{40}\text{Ti}$ | $\text{C}_{446}\text{H}_{294}\text{Fe}_3\text{N}_{34}\text{O}_{36}\text{Ti}$ |
| $D_{\text{calc.}}/\text{g cm}^{-3}$ | 1.124                                                             | 1.232                                                                        | 1.125                                                                        | 1.209                                                                        |
| $\mu/\text{mm}^{-1}$                | 2.176                                                             | 2.835                                                                        | 2.432                                                                        | 1.426                                                                        |
| Formula Weight                      | 2977.60                                                           | 4073.97                                                                      | 4375.58                                                                      | 7064.36                                                                      |
| Colour                              | orange                                                            | crimson                                                                      | crimson                                                                      | black                                                                        |
| Shape                               | block                                                             | block                                                                        | block                                                                        | cube                                                                         |
| Size/ $\text{mm}^3$                 | $0.30 \times 0.20 \times 0.10$                                    | $0.30 \times 0.20 \times 0.10$                                               | $0.30 \times 0.20 \times 0.10$                                               | $0.30 \times 0.20 \times 0.10$                                               |
| $T/\text{K}$                        | 100.00(19)                                                        | 99.98(12)                                                                    | 100.00(16)                                                                   | 100.00(11)                                                                   |
| Crystal System                      | monoclinic                                                        | triclinic                                                                    | triclinic                                                                    | trigonal                                                                     |
| Space Group                         | $Cc$                                                              | $P-1$                                                                        | $P-1$                                                                        | $R-3c$                                                                       |
| $a/\text{\AA}$                      | 31.8045(8)                                                        | 17.6307(5)                                                                   | 19.8755(10)                                                                  | 40.7336(3)                                                                   |
| $b/\text{\AA}$                      | 17.8553(3)                                                        | 19.9692(6)                                                                   | 25.7801(10)                                                                  | 40.7336(3)                                                                   |
| $c/\text{\AA}$                      | 34.7510(8)                                                        | 34.0458(9)                                                                   | 25.8788(10)                                                                  | 81.0157(7)                                                                   |
| $\alpha/^\circ$                     | 90                                                                | 99.561(2)                                                                    | 79.355(3)                                                                    | 90                                                                           |
| $\beta/^\circ$                      | 116.935(3)                                                        | 98.330(2)                                                                    | 83.215(4)                                                                    | 90                                                                           |
| $\gamma/^\circ$                     | 90                                                                | 108.172(3)                                                                   | 85.683(4)                                                                    | 120                                                                          |
| $V/\text{\AA}^3$                    | 17593.6(8)                                                        | 10980.3(6)                                                                   | 12921.2(10)                                                                  | 116413.8(17)                                                                 |
| $Z$                                 | 4                                                                 | 2                                                                            | 2                                                                            | 11.99988                                                                     |
| $Z'$                                | 1                                                                 | 1                                                                            | 1                                                                            | 0.333333                                                                     |
| Wavelength/ $\text{\AA}$            | 1.54184                                                           | 1.54184                                                                      | 1.54184                                                                      | 1.3405                                                                       |
| Radiation type                      | $\text{CuK}_\alpha$                                               | $\text{CuK}_\alpha$                                                          | $\text{CuK}_\alpha$                                                          | $\text{GaK}_\alpha$                                                          |
| $\theta_{\text{min}}/^\circ$        | 2.779                                                             | 2.385                                                                        | 2.240                                                                        | 2.187                                                                        |
| $\theta_{\text{max}}/^\circ$        | 50.436                                                            | 66.399                                                                       | 64.865                                                                       | 56.909                                                                       |
| Measured                            | 18376                                                             | 74929                                                                        | 120694                                                                       | 156225                                                                       |
| Refl's.                             |                                                                   |                                                                              |                                                                              |                                                                              |
| Indep't Refl's                      | 11000                                                             | 34861                                                                        | 42767                                                                        | 26453                                                                        |
| Refl's $I \geq 2 \sigma(I)$         | 10225                                                             | 20925                                                                        | 21067                                                                        | 20850                                                                        |
| $R_{\text{int}}$                    | 0.0265                                                            | 0.0747                                                                       | 0.0986                                                                       | 0.0333                                                                       |
| Parameters                          | 1883                                                              | 2620                                                                         | 2835                                                                         | 1546                                                                         |
| Restraints                          | 712                                                               | 249                                                                          | 444                                                                          | 132                                                                          |
| Largest Peak                        | 1.235                                                             | 0.75                                                                         | 0.79                                                                         | 1.44                                                                         |
| Deepest Hole                        | -0.397                                                            | -0.62                                                                        | -0.78                                                                        | -0.89                                                                        |
| GooF                                | 1.026                                                             | 1.030                                                                        | 1.075                                                                        | 1.052                                                                        |
| $wR_2$ (all data)                   | 0.1627                                                            | 0.1835                                                                       | 0.4488                                                                       | 0.3480                                                                       |
| $wR_2$                              | 0.1569                                                            | 0.1572                                                                       | 0.3807                                                                       | 0.3249                                                                       |
| $R_1$ (all data)                    | 0.0620                                                            | 0.1136                                                                       | 0.2012                                                                       | 0.1123                                                                       |
| $R_1$                               | 0.0577                                                            | 0.0647                                                                       | 0.1358                                                                       | 0.0984                                                                       |

## 11. Reference

- 1 He, Y.-P.; Yuan, L.-B.; Chen, G.-H.; Lin, Q.-P.; Wang, F.; Zhang, L.; Zhang, J. Water-Soluble and Ultrastable  $\text{Ti}_4\text{L}_6$  Tetrahedron with Coordination Assembly Function. *J. Am. Chem. Soc.* **2017**, *139*, 16845-16851.
- 2 He, Y.-P.; Chen, G.-H.; Li, D.-J.; Li, Q.-H.; Zhang, L.; Zhang, J. Combining a Titanium–Organic Cage and a Hydrogen-Bonded Organic Cage for Highly Effective Third-Order Nonlinear Optics. *Angew. Chem. Int. Ed.* **2021**, *60*, 2920-2923.
- 3 Williams, R. V.; Armantrout, J. R.; Twamley, B.; Mitchell, R. H.; Ward, T. R.; Bandyopadhyay, S. A Theoretical and Experimental Scale of Aromaticity. The First Nucleus-Independent Chemical Shifts (NICS) Study of the Dimethyldihdropyrene Nucleus. *J. Am. Chem. Soc.* **2002**, *124*, 13495-13505.
- 4 Ozer, M. S.; Menges, N.; Keskin, S.; Sahin, E.; Balci, M. Synthesis of Pyrrole-Fused C,N-Cyclic Azomethine Imines and Pyrazolopyrrolopyrazines: Analysis of Their Aromaticity Using Nucleus-Independent Chemical Shifts Values. *Org. Lett.* **2016**, *18*, 408-411.
- 5 Pagano, J. K.; Xie, J.; Erickson, K. A.; Cope, S. K.; Scott, B. L.; Wu, R.; Waterman, R.; Morris, D. E.; Yang, P.; Gagliardi, L.; Kiplinger, J. L. Actinide 2-metallabiphenylenes that satisfy Huckel's rule. *Nature* **2020**, *578*, 563-567.
